# Supplementary material for: Continuous sensing of IFNα by hepatic endothelial cells shapes a vascular antimetastatic barrier
Source: eLife journal article supplement (doi:10.7554/elife.80690), 2022-09-19
Supplement: fig1-figsupp1-data1 [file elife-80690-fig1-figsupp1-data1-v1.zip]

## Sheet: File info
	Figure 1- Figure supplement 1 - source data 1
	Data for the dose-response curves in the figure.

## Sheet: 1A
	Figure 1- Figure supplement 1 - source data 1
	Figure 1- Figure supplement 1 - source data 1A. Selection of the optimal IFNα dosing regimen. Platelet count from mice treated with NaClor different IFNα doses
		Days	MOPS NaCl			MOPS 50 IFNa1			MOPS 150 IFNa1			MOPS 1050 IFNa1
		-1	919	861	1340	920	833		902	1152		991	1205
		2	889	922	1363	928	1525	1330	1041	1030	1006	783	822	824
		5	931	1033	923	1087	1079	933	1098	1139	1112	987	1076	1246
		7	931	1033	923	1087	1079	933	1098	1139	1112	987	1076	1246
	p-values by one-way ANOVA Tukey’s multiple comparison test
		Summary	p value
	Day -1
	MOPS NaCl vs. MOPS 50	ns	0.7473
	MOPS NaCl vs. MOPS 150	ns	0.9999
	MOPS NaCl vs. MOPS 1050	ns	0.9874
	MOPS 50 vs. MOPS 150	ns	0.7291
	MOPS 50 vs. MOPS 1050	ns	0.4866
	MOPS 150 vs. MOPS 1050	ns	0.9674
	Day 2
	MOPS NaCl vs. MOPS 50	ns	0.8199
	MOPS NaCl vs. MOPS 150	ns	0.9957
	MOPS NaCl vs. MOPS 1050	ns	0.5191
	MOPS 50 vs. MOPS 150	ns	0.6256
	MOPS 50 vs. MOPS 1050	ns	0.2858
	MOPS 150 vs. MOPS 1050	**	0.001
	Day 5
	MOPS NaCl vs. MOPS 50	ns	0.6845
	MOPS NaCl vs. MOPS 150	ns	0.1003
	MOPS NaCl vs. MOPS 1050	ns	0.4661
	MOPS 50 vs. MOPS 150	ns	0.5101
	MOPS 50 vs. MOPS 1050	ns	0.8645
	MOPS 150 vs. MOPS 1050	ns	0.9976
	Day 7
	MOPS NaCl vs. MOPS 50	ns	0.6845
	MOPS NaCl vs. MOPS 150	ns	0.1003
	MOPS NaCl vs. MOPS 1050	ns	0.4661
	MOPS 50 vs. MOPS 150	ns	0.5101
	MOPS 50 vs. MOPS 1050	ns	0.8645
	MOPS 150 vs. MOPS 1050	ns	0.9976

## Sheet: 1B
	Figure 1- Figure supplement 1 - source data 1
	Figure 1- Figure supplement 1 - source data 1B. Selection of the optimal IFNα dosing regimen. Hematocrit from mice treated with NaCl or different IFNα doses
		Days	MOPS NaCl			MOPS 50 IFNa1			MOPS 150 IFNa1			MOPS 1050 IFNa1
		-1	52	54.9	56.4	52.3	49		50	51		52	52
		2	52.5	54.5	54.1	51.9	49.8	52.9	52	49.1	52.7	41.5	41.5	41.6
		5	51.2	46.3	48.3	45	45.4	53.1	46.9	40.02	58.8	50.1	38.6	53.5
		7	48.2	46.5	50.9	45.38	44.89	53	44.5	53.4	47.7	49.1	44.3	49.5
	p-values by one-way ANOVA Tukey’s multiple comparison test
	Day -1	Summary	p value
	MOPS NaCl vs. MOPS 50	ns	0.4498
	MOPS NaCl vs. MOPS 150	ns	0.2063
	MOPS NaCl vs. MOPS 1050	ns	0.4376
	MOPS 50 vs. MOPS 150	ns	0.9996
	MOPS 50 vs. MOPS 1050	ns	0.8498
	MOPS 150 vs. MOPS 1050	ns	0.3649
	Day 2
	MOPS NaCl vs. MOPS 50	ns	0.3451
	MOPS NaCl vs. MOPS 150	ns	0.3698
	MOPS NaCl vs. MOPS 1050	**	0.0063
	MOPS 50 vs. MOPS 150	ns	0.9973
	MOPS 50 vs. MOPS 1050	*	0.0205
	MOPS 150 vs. MOPS 1050	*	0.0312
	Day 5
	MOPS NaCl vs. MOPS 50	ns	0.993
	MOPS NaCl vs. MOPS 150	ns	>0,9999
	MOPS NaCl vs. MOPS 1050	ns	0.968
	MOPS 50 vs. MOPS 150	ns	0.9972
	MOPS 50 vs. MOPS 1050	ns	0.9999
	MOPS 150 vs. MOPS 1050	ns	0.99
	Day 7
	MOPS NaCl vs. MOPS 50	ns	0.993
	MOPS NaCl vs. MOPS 150	ns	>0,9999
	MOPS NaCl vs. MOPS 1050	ns	0.968
	MOPS 50 vs. MOPS 150	ns	0.9972
	MOPS 50 vs. MOPS 1050	ns	0.9999
	MOPS 150 vs. MOPS 1050	ns	0.99

## Sheet: 1C
	Figure 1- Figure supplement 1 - source data 1
	Figure 1- Figure supplement 1 - source data 1C. Selection of the optimal IFNα dosing regimen. Serum Alanine Aminotransferases quantification in plasma of mice treated with NaCl or different IFNα doses
		Days	MOPS NaCl			MOPS 50 IFNa1			MOPS 150 IFNa1			MOPS 1050 IFNa1
		-1	23	15	20	14	21	23	17	22	19	18	19	19
		2	21	22	18	25	18	13	24	20	15	29	22	28
		7	20	17	22	22	21	20	25	24	21	32	20	24
	p-values by one-way ANOVA Tukey’s multiple comparison test
	Day -1	Summary	p value
	MOPS NaCl vs. MOPS 50	ns	>0,9999
	MOPS NaCl vs. MOPS 150	ns	>0,9999
	MOPS NaCl vs. MOPS 1050	ns	>0,9999
	MOPS 50 vs. MOPS 150	ns	>0,9999
	MOPS 50 vs. MOPS 1050	ns	>0,9999
	MOPS 150 vs. MOPS 1050	ns	>0,9999
	Day 2
	MOPS NaCl vs. MOPS 50	ns	0.9639
	MOPS NaCl vs. MOPS 150	ns	0.9946
	MOPS NaCl vs. MOPS 1050	ns	0.2494
	MOPS 50 vs. MOPS 150	ns	0.995
	MOPS 50 vs. MOPS 1050	ns	0.3831
	MOPS 150 vs. MOPS 1050	ns	0.3371
	Day 7
	MOPS NaCl vs. MOPS 50	ns	0.8294
	MOPS NaCl vs. MOPS 150	ns	0.343
	MOPS NaCl vs. MOPS 1050	ns	0.5463
	MOPS 50 vs. MOPS 150	ns	0.4387
	MOPS 50 vs. MOPS 1050	ns	0.6749
	MOPS 150 vs. MOPS 1050	ns	0.9434
