# Supplementary material for: Continuous sensing of IFNα by hepatic endothelial cells shapes a vascular antimetastatic barrier
Source: eLife journal article supplement (doi:10.7554/elife.80690), 2022-09-19
Supplement: fig2-data1 [file Figure 2 - Source data 1.xlsx]

## Sheet: File info
	Figure 2 - source data 1
	Data for the graphs in the figure.

## Sheet: Figure 2B
	Figure 2 - Source data 1
	Figure 2B. Quantification of plasma IFNα concentration at different time points after IFNα administration
		Day	MOPS 150 IFNa1
		-8	nd	nd	3.47	nd	1.87
		-5	310.73	248.14	338.43	331.34	192.09
		-1	288.32	159.61	169.1	169.36
		7	100.8	76.72	113.08	40.98
		14	74.45	86.93	90.18	24.3	34.7675	1.265	78.3975	5.5925
		21	1.475	118.45	0.84	0.21

## Sheet: Figure 2E
	Figure 2-source data 1
	Figure 2E. Percentage of mice treated with NaCl or IFNα bearing at least one CRC liver metastasis after MC38 injection
							p-values by Fisher's exact test
		Day Days after MC38 injection	NaCl tumor bearing mice	NaCl euthanized	IFN tumor bearing mice	IFN euthanized	Summary	p value
		21	100	0	54.54	0	ns	0.4545
		28	90	10	36.36	0	*	0.034
		50	0	100	0	36.36	*	0.034

## Sheet: Figure 2F
	Figure 2-source data 1
	Figure 2F. Percentage of mice treated with NaCl or IFNα bearing at least one CRC liver metastasis after CT26 injection
							p-values by Fisher's exact test
		Day Days after CT26 injection	NaCl tumor bearing mice	NaCl euthanized	IFN tumor bearing mice	IFN euthanized	Summary	p value
		21	90	10	36.36	0	**	0.0039
		28	70	30	36.36	0	**	0.0047
		50	0	100	0	36.36	**	0.0039

## Sheet: Figure 2G
	Figure 2-source data 1
	Figure 2G. Kaplan-Meier survival curves of Sham, NaCl- or IFNα-treated mice after MC38 injection.
						Log-rank (Mantel-Cox) test NaCl vs IFN
		Day	SHAM	NaCl	IFN	P value summary	P value
		50	0			***	0.0003
		50	0
		50	0
		48		1
		47		1
		28		1
		43		1
		27		1
		29		1
		29		1
		36		1
		28		1
		41		1
		50			0
		50			0
		50			0
		50			0
		50			0
		50			0
		29			1
		38			1
		50			0
		38			1
		38			1

## Sheet: Figure 2H
	Figure 2-source data 1
	Figure 2H. Kaplan-Meier survival curves of Sham, NaCl- or IFNα-treated mice after CT26 injection.
							Log-rank (Mantel-Cox) test NaCl vs IFN
			Day	SHAM	NaCl	IFN	P value summary	P value
			50	0			**	0.0029
			50	0
			50	0
			21		1
			28		1
			28		1
			40		1
			41		1
			40		1
			50			0
			38			1
			50			0
			36			1
			50			0
			50			0
			50			0
			50			0
			50			0
			36			1
			50			0
