# Supplementary material for: Continuous sensing of IFNα by hepatic endothelial cells shapes a vascular antimetastatic barrier
Source: eLife journal article supplement (doi:10.7554/elife.80690), 2022-09-19
Supplement: fig2-figsupp1-data1 [file Figure 2 - figure supplement 1 - source data 1.xlsx]

## Sheet: File info
	Figure 2 - figure supplement 1 - source data 1
	Data for the graphs in the figure.

## Sheet: 1A
	Figure 2 - figure supplement 1 - source data 1A. WBC counts of mice treated with NaCl or IFNα and injected with MC38
	Days	SHAM				MOPS-NaCl												MOPS-IFNa1
	-8	11.24	4.77	2.98	4.62	9.35	11	8.77	7.3	8.34	8.81	6.75	8.09	9.11	5.41	6.6	3.93	10.19	8.72	9.28	11.88	12.89	9.11	5.89	3.65	6.64	5.79	4.67	6.3
	-5	14.8	8.42	9.31	10.17	8.73	11.24	8.43	9.18	7.1	8.39	5.88	5.38	7.13	5.85	9.17	7.39	5.57	5.77	5.64	4.63	4.09	3.91	3.18	4.9	5.97	5.46	4.01	4.35
	-2	7.13	8.69	7.02	10.97	11.09	7.67	8.43	6.66	7.2	7.22	13.78	10.44	12.39	7.33	6.14	7.57	5.84	10.62	6.15	7.7	5.66	8.94	6.08	8.47	4.65	5.69	9.88	9.32
	7	8.64	7.25	5.63	9.62	17.61	21.55	19.47	16.96	15.53		3.79	7.55	5.08	8.68	4.06	5.52	12.23	14.11	11.64	15.2	9.49	14.07	2.8	4.41	5.92	5.02	5.25	7.02
	14	11.98	6.71	6.91	11.04	18.63	15.71	14.07	12.84	18.07	13.37	3.79	7.3	7.21	6.79	10.36	7.67	11.43	10.51	8.81	7.53	7.98	11.87	9.82	8.99	8.65	7.31	10.5	8.68
	21	10.04	11.23			7.88	12.39	14.39	10.07	7.56	7.87							9.08	7.73	8.06	8.17	9.52	11.72
	one-way ANOVA Tukey’s multiple comparison test	Summary	p value
	Day -8
	SHAM vs. MOPS-NaCl	ns	0.6248
	SHAM vs. MOPS-IFNa1	ns	0.61
	MOPS-NaCl vs. MOPS-IFNa1	ns	0.9908
	Day -5
	SHAM vs. MOPS-NaCl	ns	0.2596
	SHAM vs. MOPS-IFNa1	*	0.0479
	MOPS-NaCl vs. MOPS-IFNa1	***	0.0001
	Day -2
	SHAM vs. MOPS-NaCl	ns	0.9453
	SHAM vs. MOPS-IFNa1	ns	0.6305
	MOPS-NaCl vs. MOPS-IFNa1	ns	0.2927
	Day 7
	SHAM vs. MOPS-NaCl	ns	0.2662
	SHAM vs. MOPS-IFNa1	ns	0.7405
	MOPS-NaCl vs. MOPS-IFNa1	ns	0.5627
	Day 14
	SHAM vs. MOPS-NaCl	ns	0.5345
	SHAM vs. MOPS-IFNa1	ns	0.9914
	MOPS-NaCl vs. MOPS-IFNa1	ns	0.3915
	Day 21
	SHAM vs. MOPS-NaCl	ns	0.8882
	SHAM vs. MOPS-IFNa1	ns	0.2755
	MOPS-NaCl vs. MOPS-IFNa1	ns	0.7409

## Sheet: 1B
	Figure 2 - figure supplement 1 - source data 1B. WBC counts of mice treated with NaCl or IFNα and injected with CT26
	Days	SHAM							MOPS-NaCl										MOPS-IFNa1
	-8	10.21	7.61	7.87	8.77	6.84	8.28	8.69	8.7	7.89	9.71	10.1	5.25	6.26	7.73	9.27	8.95	0.31	7.15	10.78	9.34	10.92	8.88	7.57	7.3	9.06	6.56	8.17	7.48
	-5	5.43	8.52	11.33	11.45	6.51	9.92	9.86	5.06	7.7	8.78	5.79	4.88	9.76	10.81	11.68	8.34	8.22	4.15	4.85	5.21	4.5	6.71	2.97	3.6	5.23	4.03	3.57	5.84
	-2	4.02	6.14	7.89	7.6	6.21	5.86	7.57	5.22	6.52	8.2	5.03	10.69	7.49	12.09	12.06	11.04	7.82	4.59	5.61	6.57	6.35	6.93	6.38	4.83	4.63	3.94	3.29	6.15
	7	11.57	10.5	8.67	9.93	7.29	5.89	6.3	7.58	8.4	10.5	9.6	10.13	8.65	9.15	9.48	11.32	10.62		13.43	15.25	9.3	9.38	4.77	7.83	8.92	6.91	3.83	8.01
	14	13.82	10.65	8.67	9.93	7.29	5.89	6.3	6.62	4.47	6.15	7.34	10.16	10.22	11.43	10.3	9.94	6.72	7.21	6.48	4.25	4.73	3.97	7.36	7.23	7.51	4.97	4.99	5.17
	21	11.78	9.04	9.12	8.67	7.29	10.24		6.47	11.29	9.88	8.75	5.76	9.94	13.46	10.3	9.36	6.97	7.95	8.32	7.37	5.44	6.62	4.88	5.17	8.77	7.14	10.32	6.55
	one-way ANOVA Tukey’s multiple comparison test	Summary	p value
	Day -8
	SHAM vs. MOPS-NaCl	ns	0.6501
	SHAM vs. MOPS-IFNa1	ns	0.9661
	MOPS-NaCl vs. MOPS-IFNa1	ns	0.5701
	Day -5
	SHAM vs. MOPS-NaCl	ns	0.7164
	SHAM vs. MOPS-IFNa1	**	0.0042
	MOPS-NaCl vs. MOPS-IFNa1	**	0.0023
	Day -2
	SHAM vs. MOPS-NaCl	ns	0.1131
	SHAM vs. MOPS-IFNa1	ns	0.2373
	MOPS-NaCl vs. MOPS-IFNa1	*	0.0111
	Day 7
	SHAM vs. MOPS-NaCl	ns	0.5645
	SHAM vs. MOPS-IFNa1	ns	0.9916
	MOPS-NaCl vs. MOPS-IFNa1	ns	0.7843
	Day 14
	SHAM vs. MOPS-NaCl	ns	0.7521
	SHAM vs. MOPS-IFNa1	ns	0.0583
	MOPS-NaCl vs. MOPS-IFNa1	ns	0.0533
	Day 21
	SHAM vs. MOPS-NaCl	ns	0.8685
	SHAM vs. MOPS-IFNa1	*	0.0427
	MOPS-NaCl vs. MOPS-IFNa1	ns	0.1709

## Sheet: 1C
	Figure 2 - figure supplement 1 - source data 1C. qPCR analyses of Irf7 mRNAs expression within the metastatic liver tissue of mice treated with NaClor IFNαm after MC38 injection
													Mann Whitney test NaCl vs IFNa
	SHAM		MOPS-NaCl					MOPS-IFNa1					Summary	P value
	1.15	0.87	1.24	1.25	1.87	1.29	1.35	5.42	8.3	7.79	3.85	3.37	**	0.0079

## Sheet: 1D
	Figure 2 - figure supplement 1 - source data 1D. qPCR analyses of Irf7 mRNAs expression within the metastatic liver tissue of mice treated with NaClor IFNαm after CT26 injection
											Mann Whitney test NaCl vs IFNa
	SHAM		MOPS-NaCl				MOPS-IFNa1				Summary	P value
	1.18	0.85	1.31	1.24	1.74	1.34	5.71	7.73	3.61	3.18	*	0.0286

## Sheet: 1G
	Figure 2 - figure supplement 1 - source data 1G. Number of lesions in the liver of mice treated with MOP-NaCl or MOP-IFNα and injected with MC38
																			Mann Whitney test NaCl vs IFNa
	Day	MOPS-NaCl						MOPS-IFNα1											Summary	P value
	21	25	2	25	2	1	11	8	0	2	0	1	1	0	0	0	1	3	*	0.0147
	28	25	5	25	5	1	15	11	0	2	0	0	0	0	0	0	1	15	**	0.0082
	50	na	na	na	na	na	na	na	0	na	0	0	0	0	0	0	na

## Sheet: 1H
	Figure 2 - figure supplement 1 - source data 1H. Number of lesions in the liver of mice treated with MOP-NaCl or MOP-IFNα and injected with CT26
																							Mann Whitney test NaCl vs IFNa
	Day	MOPS-NaCl										MOPS-IFNα1											Summary	P value
	21	12	25	10	25	25	35	3	6	3	8	0	0	0	0	0	1	1	0	0	5	1	****	<0,0001
	28	na	25	10	25	25	na	3	12	3	15	0	0	0	0	0	3	na	2	0	8	2	***	0.0001
	50	na	na	na	na	na	na	na	na	na	na	0	0	0	0	0	na	na	na	0	na	na

## Sheet: 1I
	Figure 2 - figure supplement 1 - source data 1I. Total tumor volume in the liver of mice treated with MOP-NaCl or MOP-IFNα after MC38
																	Mann Whitney test NaCl vs IFNa
	Day	MOPS-NaCl						MOPS-IFNα1									Summary	P value
	21	223	10.4	76	5	0.7	18	1.5	0	0.6	0.7	0	0	0	1.3	23.3	*	0.0275
	28	3138	138	1207	109	1	201	5	0	0	0	0	0	0	2.3	364	*	0.0161
	50	na	na	na	na	na	na	na	0	0	0	0	0	0	na	na

## Sheet: 1J
	Figure 2 - figure supplement 1 - source data 1J. Total tumor volume in the liver of mice treated with MOP-NaCl or MOP-IFNα after CT26
																							Mann Whitney test NaCl vs IFNa
	Day	MOPS-NaCl										MOPS-IFNα1											Summary	P value
	21	953	55.1	111	13.1	62.6	24.6	1.3	5	1	5	0.4	1	0	0	1.1	1	0	0	0	0	0	****	<0,0001
	28		1877	149	1461	231	na	27	47	81	563	1.3	0	22.8	0	60	67	0	0	0	0	0	***	0.0001
	50	na	na	na	na	na	na	na	na	na	na	na	0	na	0	na	na	0	0	0	0	0
