# Supplementary material for: Continuous sensing of IFNα by hepatic endothelial cells shapes a vascular antimetastatic barrier
Source: eLife journal article supplement (doi:10.7554/elife.80690), 2022-09-19
Supplement: fig3-data1 [file Figure 3 - Source data 1.xlsx]

## Sheet: File info
	Figure 3 - Source data 1
	Data for the graphs in the figure.

## Sheet: Figure 3B
	Figure 3-Source data 1
	Figure 3B. Quantification of plasma IFNα concentration after cecal wall injection of CT26LM3 cells in mice treated with NaCl or IFNa.
		Day	MOPS-NaCl							MOPS-150 IFNa1
		5	nd	nd	nd	nd	nd	nd	nd	nd	nd	nd	nd	nd	nd
		9	nd	nd	nd	nd	nd	nd	nd	137.1	36.5	106	385.6	77.6	241.3
		14	nd	nd	nd	nd	nd	nd	nd	60.6	80.4	155.2
		21	nd	nd	nd	nd	nd	nd	nd	34	32.9	41.1

## Sheet: Figure 3C
	Figure 3-source data 1
	Figure 3C. WBC counts from mice after cecal wall injection of CT26LM3 cells and treated with NaCl or IFNa.
		Day	Sham					MOPS-NaCl										MOPS-150 IFNa1
		-2	5.34	6.26				4.69	4.36	4.67								8	4.08	3.76
		5	8.11	7.86	4.85			7.29	7.68	7.17	8.42	5.84	8.4	7.68	7.95	9.43	5.71	5.21	7.61	6.33	6.02	4.76	7.3
		9	3.03	9.07	11.42	10.54	11.41	9.56	11.42	12.15	7.15	10.48	7.44	7.82	8.96	7.6	8.44	3.14	4.05	5.34	3.62	7.17	3.88
		14	6.6	6.51	6.79			8.85	7.25	6.88	4.59	8.8	5.5	4.85	7.73	4.98	6.89	3.9	3.7	3.46	9.32
		21	7.25	6.55				10.82	7.57	5.69	7.61	10.62	10.33	8.23				11.2	5.38	10.03	5.3	11.27	8.18
		p-values by one-way ANOVA Tukey’s multiple comparison test
		Day -2				Summary	p value
		Sham vs. MOP-NaCl				ns	0.323
		Sham vs. MOP-IFNa1 150				ns	0.9325
		MOP-NaCl vs. MOP-IFNa1 150				ns	0.8717
		Day 5
		Sham vs. MOP-NaCl				ns	0.8521
		Sham vs. MOP-IFNa1 150				ns	0.8099
		MOP-NaCl vs. MOP-IFNa1 150				ns	0.0958
		Day 9
		Sham vs. MOP-NaCl				ns	>0,9999
		Sham vs. MOP-IFNa1 150				ns	0.0893
		MOP-NaCl vs. MOP-IFNa1 150				***	0.0003
		Day 14
		Sham vs. MOP-NaCl				ns	>0,9999
		Sham vs. MOP-IFNa1 150				ns	0.582
		MOP-NaCl vs. MOP-IFNa1 150				ns	0.6034
		Day 21
		Sham vs. MOP-NaCl				ns	0.1382
		Sham vs. MOP-IFNa1 150				ns	0.3922
		MOP-NaCl vs. MOP-IFNa1 150				ns	0.9943

## Sheet: Figure 3E
	Figure 3-source data 1
	Figure 3E. Quantification of the weight of primary CRC tumors 21 days after CT26LM3 cells intracecal wall injection in mice treated with NaCl or IFNa.
		MOP-NaCl							MOP-IFNa
	gr	1.4	1	0.9	1.1	4.9	1.3	1.4	1.1	0.6	1.6	1	1	2.1

## Sheet: Figure 3F
	Figure 3-source data 1
	Figure 3F. Hepatic lesions and total tumor volume of liver metastases 21 days after CT26LM3 cells intracecal wall injection in mice treated with NaCl or IFNa.
															Mann Whitney test
		MOP-NaCl							MOP-IFNa						Summary	P value
	Number of lesions	2	5	3	0	20	3	15	1	0	1	0	0	2	*	0.0198
															Mann Whitney test
		MOP-NaCl							MOP-IFNa						Summary	P value
	Total tumor Volume	0.8	0.83	0.6	0	20	1	4.2	0.2	0	0.4	0	0	0.5	*	0.014

## Sheet: Figure 3H
	Figure 3-source data 1
	Figure 3H. Percentage of mice bearing liver metastases, tumor area and the number of cells expressing Ki67, CD34, F4/80 and CD3 per mm2.
		% of Tumor bearing mice		p-values by Fisher's exact test
		MOP-NaCl	MOP-IFN	Summary	p value
		100	42.85	*	0.018
		Number of hepatic lesion			Mann Whitney test NaCl vs IFNa
		SHAM	MOP-NaCl	MOP-IFN	Summary	P value
		0	2.67	1.15	***	0.0001
		0	0.01	0.33
		0	0.11	0.04
		0	0.21	0.06
		0	0.34	0
		0	1.05	0
		0	0.52	0
		0	2.01	0
		0	1.46	0
		0	0.34	0
		0	0.91	0
		0	0.25	0
		0	0.47	0
		Number of cells expressing Ki67/mm2			Mann Whitney test NaCl vs IFNa
		SHAM	MOP-NaCl	MOP-IFN	Summary	P value
		90.77	4614.9	119.1	*	0.0104
		206.63	5871	370.58
		123.2	3972.7	217.28
		390.72	4154.3	237.17
		208.56	3604.3	149.24
		160.23	3652.4	247.07
		274.7	4248.5	4179.2
		108.52	4638.3	2562.9
		113.89	4130.6	4256.2
		351.45	4323.5	3125.8
		221.36	4335.8	6704.8
		Number of cells expressing CD34/mm2			Mann Whitney test NaCl vs IFNa
		SHAM	MOP-NaCl	MOP-IFN	Summary	P value
		0	1845.8	0	*	0.0494
		0	1418.1	0
		0	347.12	21.68
		12.96	1983.2	0
		23.8	1372.6	21.83
		0	1707.3	5.91
		7.13	827.53	1638.7
		0	1529.6	2302.3
		Number of cells expressing F4/80/mm2			Mann Whitney test NaCl vs IFNa
		SHAM	MOP-NaCl	MOP-IFN	Summary	P value
		523.17	394.55	530.21	*	0.0365
		803.93	1157.2	461.62
		754.45	897.54	421.85
		384.12	1805.6	403.12
		456.86	1377.2	507.67
		294.65	1138.8	275.15
		812.3	996.03	754.1
		438.49	806.19	846.67
		258.91	1025.5	1164.5
		402.6	607.2	1164.1
		516.75	814.77	775.79
		605.2	1209.1	1687.9
		Number of cells expressing CD3/mm2			Mann Whitney test NaCl vs IFNa
		SHAM	MOP-NaCl	MOP-IFN	Summary	P value
		15.79	301.21	236.94	*	0.0246
		0	347.87	682.29
		312.85	1096.9	1129
		0	524.69	205.65
		0	78.5	13.97
		80.78	576.69	0
		54.11	1358.1	322.77
		194.13	963.27	0
		15.8	235.07	0
		22.8	14.7	84.52
		84.96	107.86	45.16
		77.85	25.07	129.31
			150.15	15.08
			38.57	28.02
			267.87	96.84
			343.38	83.77
			689.09
			187.59
