# Supplementary material for: Continuous sensing of IFNα by hepatic endothelial cells shapes a vascular antimetastatic barrier
Source: eLife journal article supplement (doi:10.7554/elife.80690), 2022-09-19
Supplement: fig3-figsupp1-data1 [file Figure 3 - figure supplement 1 - source data 1.xlsx]

## Sheet: File info
	Figure 3 - figure supplement 1 - source data 1
	Data for the graphs in the figure.

## Sheet: 1B
	Figure 3 - figure supplement 1
	Figure 3 - figure supplement 1B. Percentage of mice bearing at least one macroscopic liver metastasis 28 days after intracecal wall injection of CT26LM1, CT26LM2 or CT26LM3
		T2	T3	T4
		20	57.14	100
		p-values by Fisher's exact test T4 vs T2
		Summary	p value
		***	0.0001

## Sheet: 13C
	Figure 3 - figure supplement 1
	Figure 3 - figure supplement 1C. Number of hepatic lesions in mice 28 days after intracecal wall injection of CT26LM1, CT26LM2 or CT26LM3
	T2					T3							T4
	2	0	0	0	0	0	3	1	1	1	0	0	1	4	10	6	12
	Mann Whitney test T3 vs T2
	Summary	p value
	ns	0.4078
	Mann Whitney test T4 vs T3
	Summary	p value
	*	0.0139
	Mann Whitney test T4 vs T2
	Summary	p value
	*	0.0159
