# Supplementary material for: Continuous sensing of IFNα by hepatic endothelial cells shapes a vascular antimetastatic barrier
Source: eLife journal article supplement (doi:10.7554/elife.80690), 2022-09-19
Supplement: fig3-figsupp2-data1 [file Figure 3 - figure supplement 2 - source data 1.xlsx]

## Sheet: File info
	Figure 3 - figure supplement 2 - source data 1
	Data for the graphs in the figure.

## Sheet: 1B
	Figure 3 - figure supplement 2_Source data 1B. Quantification of the number of cells expressing Ki67, CD34, F4/80 and CD3 per mm2 of sham mice and within primary CRC cecal tumors developed in NaCl- and IFNα-treated mice
	Ki67 positive cells/mm2	Sham	MOP-NaCl	MOP-IFNa1				p-values by Mann-Whitney test
		100	3990.98	5332.16
		203	4686.3	3847.65				MOP-NaCl vs Sham
		116	4959.77	5709.37				Summary	p value
		362	5928.08	5165.92				***	0.0007
		258.23	8087.3	7118.64
		236.16	6574.58	5797.45				MOP-IFNa vs Sham
		148.2						Summary	p value
		247.07						***	0.0006
	CD34 positive cells/mm2	Sham	MOP-NaCl	MOP-IFNa1				p-values by Mann-Whitney test
		114.3	3053.15	1384.56
		140.896	2980.03	2364.71				MOP-NaCl vs Sham
		107.325	2661.33	463.449				Summary	p value
		69.5802	3046.23	1919.61				****	<0,0001
		184.68	2056.32	2828.18
		120.502	2985.67	1974.54				MOP-IFNa vs Sham
		178.554		3244.86				Summary	p value
		796.41						****	<0,0001
		177.256
		398.974
		17.9449
		122.503
		207.56
	F4/80 positive cells/mm2	Sham	MOP-NaCl	MOP-IFNa1				p-values by Mann-Whitney test
		759.12	1554.34	1172.3
		1134.92	1024.22	1087.67				MOP-NaCl vs Sham
		617.278	1210.99	297.419				Summary	p value
		797.408	1459.35	1581.12				***	0.0005
		1008.73	1904.81	1092.95
		650.12	1367.86	1144.8				MOP-IFNa vs Sham
		700		1180.22				Summary	p value
		817.512						*	0.0456
		483.736
		512.322
		1272.7
		850.257
		789.661
	CD3 positive cells/mm2	Sham	MOP-NaCl	MOP-IFNa1				p-values by Mann-Whitney test
		155.254	368.426	178.809
		428.812	291.497	826.672				MOP-NaCl vs Sham
		79.346	650.119	769.818				Summary	p value
		454.435	63.6636	218.881				ns	0.5532
		200.75	314.999	660.201
		167.097	612.209	350.635				MOP-IFNa vs Sham
		425.661		361.411				Summary	p value
		393.469						ns	0.1198
		162.148
		153.345
		436.942
		332.343

## Sheet: 1D
	Figure 3 - figure supplement 2_Source data 1D. Quantification of the number of cells expressing Ki67, CD34, F4/80 and CD3 per mm2 of sham mice and within all metastatic lesions found in MOP-NaCl and MOP-IFNa mice.
	Ki67 positive cells/mm2	Sham	MOP-NaCl	MOP-IFNa1		p-values by Mann-Whitney test
		90.77	4614.9	4179.2
		206.63	5871	4256.2		MOP-NaCl vs Sham
		119.1	3972.7	3125.8		Summary	p value
		370.58	4154.3	6704.8		****	<0,0001
		217.28	3604.3
		237.17	3652.4			MOP-IFNa vs Sham
		149.24	4248.5			Summary	p value
		247.07	4638.3			**	0.004
			4130.6
			4323.5
			4335.8
	CD34 positive cells/mm2	Sham	MOP-NaCl	MOP-IFNa1		p-values by Mann-Whitney test
		0	1845.8	1638.7
		0	1418.1	2302.3		MOP-NaCl vs Sham
		21.68	347.12			Summary	p value
		0	1983.2			***	0.0007
		21.83	1372.6
		5.91	1707.3			MOP-IFNa vs Sham
			827.53			Summary	p value
			1529.6			*	0.0357
	F4/80 positive cells/mm2	Sham	MOP-NaCl	MOP-IFNa1		p-values by Mann-Whitney test
		530.21	394.55	1164.5
		461.62	1157.2	1164.1		MOP-NaCl vs Sham
		421.85	897.54	775.79		Summary	p value
		403.12	1805.6	1687.9		**	0.0013
		507.67	1377.2
		275.15	1138.8			MOP-IFNa vs Sham
		754.1	996.03			Summary	p value
		846.67	806.19			**	0.0059
		523.17	1025.5
		803.93	607.2
		754.45	814.77
			1209.1
	CD3 positive cells/mm2	Sham	MOP-NaCl	MOP-IFNa1		p-values by Mann-Whitney test
		13.97	301.21	236.94
		0	347.87	682.29		MOP-NaCl vs Sham
		322.77	1096.9	1129		Summary	p value
		0	524.69	205.65		***	0.001
		0	78.5
		84.52	576.69			MOP-IFNa vs Sham
		45.16	1358.1			Summary	p value
		129.31	963.27			**	0.0038
		15.08	235.07
		28.02	14.7
		96.84	107.86
		83.77	25.07
			150.15
			38.57
			267.87
			343.38
			689.09
			187.59
