# Supplementary material for: Continuous sensing of IFNα by hepatic endothelial cells shapes a vascular antimetastatic barrier
Source: eLife journal article supplement (doi:10.7554/elife.80690), 2022-09-19
Supplement: fig4-data1 [file Figure 4 - Source data 1.xlsx]

## Sheet: File info
	Figure 4-source data 1
	Data for the graphs in the figure.

## Sheet: Figure 4C
	Figure 4-Source data 1
	Figure 4C. Number of hepatic lesions 21 days after CRC cells injection in NaCl and IFNα-treated mice found in C57BL/6, Ifnar1fl/fl and all conditional Ifnar1_KO mouse models
													p-values by Mann-Whitney test
													Summary	p value
	C57BL/6 + NaCl	4	2	7	6	12	9	20	20				**	0.0023
	C57BL/6 + IFNa	0	1	1	0	1	5
	MC38_Ifnar1_KO + NaCl	0	18	25	22	10
	MC38_Ifnar1_KO + IFNa	0	0	0	0	0							*	0.0476
	Ifnar fl/fl + NaCl	27	23	80	30	3	33						*	0.012
	Ifnar fl/fl + IFNa	0	0	0	0	0	4	1	0	0	1	0
	Alb_Ifnar1_KO + NaCl	20	30	60	30	30	30						***	0.001
	Alb_Ifnar1_KO + IFNa	2	2	0	12	5	0	3	20
	Pdgfrb_Ifnar1_KO + NaCl	36	1	11	25	45							*	0.0265
	Pdgfrb_Ifnar1_KO + IFNa	0	5	1	2	0	1	5
	Itgax_Ifnar1_KO + NaCl	4	6	1	16	6	5	8	4				*	0.0126
	Itgax_Ifnar1_KO + IFNa	0	6	5	0	0	0	0	1
	VeCad_Ifnar1_KO + NaCl	23	45	27	33	15	45	60	17	16	7
	VeCad_Ifnar1_KO + IFNa	22	18	43	14	45	10	21	24	55			ns	0.9047

## Sheet: Figure 4D
	Figure 4-Source data 1
	Figure 4D . Total tumor volume 21 days after CRC cells injection in NaCl and IFNα-treated mice found in C57BL/6, Ifnar1fl/fl and all conditional Ifnar1_KO mouse models
													p-values by Mann-Whitney test
													Summary	p value
	C57BL/6 + NaCl	8.5	0.7	13.3	68.2	125	10.5	356	240				*	0.0123
	C57BL/6 + IFNa	0	0.5	0.2	0	15.7	3.2
	MC38_Ifnar1_KO + NaCl	0	88	300	320	290							*	0.0476
	MC38_Ifnar1_KO + IFNa	0	0	0	0	0
	Ifnar fl/fl + NaCl	28	255	345	80	5.6	142						***	0.0002
	Ifnar fl/fl + IFNa	0	0	0	0	0	9	3.6	0	0	0.9	0
	Alb_Ifnar1_KO + NaCl	272	303	637	193	212	268						***	0.0007
	Alb_Ifnar1_KO + IFNa	0	87	5.1	0	65.7	92.3
	Pdgfrb_Ifnar1_KO + NaCl	110	0.7	44	110	527							*	0.0114
	Pdgfrb_Ifnar1_KO + IFNa	0	8	0.7	0.4	0	0.6	15
	Itgax_Ifnar1_KO + NaCl	1.3	2.9	0.2	62.1	41.5	127.7	23.5	33.8				**	0.0064
	Itgax_Ifnar1_KO + IFNa	6.4	0	2.8	0	0	0	0	1.6
	VeCad_Ifnar1_KO + NaCl	550	140	145	165	100	400	495	613	284	510		ns	0.0653
	VeCad_Ifnar1_KO + IFNa	115	190	85	70	150	21	204	306	310
	Ifnar fl/fl + NaCl	28	255	345	80	5.6	142						*	0.042
	VeCad_Ifnar1_KO + NaCl	550	140	145	165	100	400	495	613	284	510

## Sheet: Figure 4E
	Figure 4-Source data 1
	Figure 4E. Kaplan-Meier survival curves of NaCl and IFNα-treated C57BL/6 mice injected with MC38 or MC38_Ifnar1_KO cells
						Log-rank (Mantel-Cox) test NaCl vs IFN
	MC38	Day	SHAM	NaCl	IFN	P value summary	P value
		50	0			***	0.0005
		50	0
		50	0
		41		1
		44		1
		41		1
		33		1
		29		1
		35		1
		35		1
		32		1
		50			0
		50			0
		50			0
		50			0
		47			1
		47			1
						Log-rank (Mantel-Cox) test NaCl vs IFN
	MC38_Ifnar1_KO	Day	SHAM	NaCl	IFN	P value summary	P value
		50	0			**	0.0047
		50	0
		50	0
		43		1
		43		1
		34		1
		35		1
		35		1
		50			0
		50			0
		50			0
		50			0
		50			0

## Sheet: Figure 4F
	Figure 4-Source data 1
	Figure 4F. Kaplan-Meier survival curves of NaCl and IFNα-treated conditional Ifnar1_KO mouse models
						Log-rank (Mantel-Cox) test NaCl vs IFN
	Alb_Ifnar1_KO	Day	SHAM	NaCl	IFN	P value summary	P value
		50	0			*	0.016
		50	0
		50	0
		32		1
		42		1
		21		1
		42		1
		50		0
		29		1
		29		1
		26		1
		29		1
		35		1
		29		1
		38			1
		50			0
		50			0
		50			0
		26			1
		50			0
		29			1
		50			0
		50			0
		42			1
		35			1
						Log-rank (Mantel-Cox) test NaCl vs IFN
	Pdgfrb_Ifnar1_KO	Day	SHAM	NaCl	IFN	P value summary	P value
		50	0			*	0.0109
		50	0
		50	0
		34		1
		50		0
		34		1
		33		1
		21		1
		50			0
		50			0
		50			0
		50			0
		50			0
		50			0
		40			1
						Log-rank (Mantel-Cox) test NaCl vs IFN
	Itgax_Ifnar1_KO	Day	SHAM	NaCl	IFN	P value summary	P value
		50	0			*	0.0313
		50	0
		50	0
		50		1
		32		1
		50		0
		30		1
		33		1
		44		1
		33		1
		44		1
		50			0
		49			1
		50			0
		50			0
		50			0
		41			1
		50			0
		41			1
						Log-rank (Mantel-Cox) test NaCl vs IFN
	VeCad_Ifnar1_KO	Day	SHAM	NaCl	IFN	P value summary	P value
		50	0			ns	>0,9999
		50	0
		50	0
		21		1
		28		1
		28		1
		28		1
		28		1
		29		1
		27		1
		27		1
		22		1
		25		1
		27			1
		29			1
		28			1
		29			1
		29			1
		29			1
		31			1
		31			1
		30			1
