# Supplementary material for: Continuous sensing of IFNα by hepatic endothelial cells shapes a vascular antimetastatic barrier
Source: eLife journal article supplement (doi:10.7554/elife.80690), 2022-09-19
Supplement: fig4-figsupp1-data2 [file Figure 4 - figure supplement 1 - source data 2.xlsx]

## Sheet: File info
	Figure 4 - figure supplement 1 - source data 2
	Data for the graphs in the figure.

## Sheet: 1C
	Figure 4 - figure supplement 1 - source data 1C. MC38B2, MC38C8 cells and MC38 controls qPCR of the Irf7 gene after 4 hours of in vitro stimulation with IFNα
			MC38	MC38 + IFNa	MC38B2	MC38B2 + IFNa	MC38C8	MC38C8 + IFNa
			1.125	32.459	0.938	23.503	0.953	0.906
			0.814	25.942	1.091	22.818	0.969	0.863
			1.093	37.999	0.978	20.17	1.083	0.865
	one-way ANOVA Tukey’s multiple comparison test		Summary	p value
	MC38 vs. MC38 + IFNa		****	<0,0001
	MC38 vs. MC38B2		ns	>0,9999
	MC38 vs. MC38B2+ IFNa		****	<0,0001
	MC38 vs. MC38C8		ns	>0,9999
	MC38 vs. MC38C8+ IFNa		ns	>0,9999
	MC38 + IFNa vs. MC38B2		****	<0,0001
	MC38 + IFNa vs. MC38B2+ IFNa		**	0.0048
	MC38 + IFNa vs. MC38C8		****	<0,0001
	MC38 + IFNa vs. MC38C8+ IFNa		****	<0,0001
	MC38B2 vs. MC38B2+ IFNa		****	<0,0001
	MC38B2 vs. MC38C8		ns	>0,9999
	MC38B2 vs. MC38C8+ IFNa		ns	>0,9999
	MC38B2+ IFNa vs. MC38C8		****	<0,0001
	MC38B2+ IFNa vs. MC38C8+ IFNa		****	<0,0001
	MC38C8 vs. MC38C8+ IFNa		ns	>0,9999

## Sheet: 1F
	Figure 4 - figure supplement 1 - source data 1F. Percentage of GFP+ cells that colocalize with specific cell type markers for the most relevant Cre recombinant mouse models PDGFRβCreERT2, CD11cCre and VeCadCreERT2.
	PDGFRb	CD11c	F4/80	CD31
	99.136	99.45	68.08	75.271
	99.599	95.05	77.56	90.967
	98.841	87.3	75.18	89.694
	95.418	95.97	74.59
	99.58	99.04	84.67
	96.523	88.22	88.73
