# Supplementary material for: Continuous sensing of IFNα by hepatic endothelial cells shapes a vascular antimetastatic barrier
Source: eLife journal article supplement (doi:10.7554/elife.80690), 2022-09-19
Supplement: fig4-figsupp3-data1 [file Figure 4 - figure supplement 3 - source data 1.xlsx]

## Sheet: File info
	Figure 4 - figure supplement 3 - source data 1
	Data for the graphs in the figure.

## Sheet: 1B
	Figure 4 - figure supplement 3 - source data 1B. Percentage of tumor area and the number of cells expressing CD34, F4/80 and CD3 per mm2 of liver metastatic lesions in NaCl- and IFNα-treated Ifnar1fl/fl and VeCadIfnar1_KO mice.
	% of tumor within liver	Sham	Ifnar1fl/fl + NaCl	Ifnar1fl/fl + IFNa	VeCadIfnar1_KO + NaCl	VeCadIfnar1_KO + IFNa
		0	17.55	0	81.68	36
		0	32.31	0	11.5	23.01
		0	49.85	0	45.68	59
		0	10.79	0
		0
		0
	Mann Whitney test Ifnar1fl/fl + NaCl vs Ifnar1fl/fl + IFNa
	P value	0.0286
	Summary	*
	CD34+ cells/mm2	Sham	Ifnar1fl/fl + NaCl	Ifnar1fl/fl + IFNa	VeCadIfnar1_KO + NaCl	VeCadIfnar1_KO + IFNa
		0	432.99	66.44	2555.19	27.32
		0	145.73	35.82		198.94
		0	152.73	14.46		363.5
		11.86	164.13	13.38	176.05	66.71
		21.75	175.55	49.37	105.82	163.21
		6.12	204.96	30.74
		0	393.73	9.28
		0	315.9	16.8
	Mann Whitney test Ifnar1fl/fl + NaCl vs Ifnar1fl/fl + IFNa
	P value	0.0002
	Summary	***
	F4/80+ cells/mm2	Sham	Ifnar1fl/fl + NaCl	Ifnar1fl/fl + IFNa	VeCadIfnar1_KO + NaCl	VeCadIfnar1_KO + IFNa
		223.17	1234.05	279.06	2169.8	1287.21
		384.12	931.75	368.02	1614.42	2051.19
		256.86	1241.88	395.72	1603.95	787.19
		294.65	1391.39	251.28		2049.68
		238.49	2638.33	319.38		1979.71
		258.91	2923.17	217.35
		402.6	3087.67	304.59
				373.15
	Mann Whitney test Ifnar1fl/fl + NaCl vs Ifnar1fl/fl + IFNa
	P value	0.0003
	Summary	***
	CD3+ cells/mm2	Sham	Ifnar1fl/fl + NaCl	Ifnar1fl/fl + IFNa	VeCadIfnar1_KO + NaCl	VeCadIfnar1_KO + IFNa
		15.79	128.85	84.7	891.52	249.58
		80.78	398.37	66.7	793.28	1428.6
		54.11	452.53	49.22	743.6	1387.47
		15.8	400.36	55.09		1528.65
		22.8	452.53	27.49
		77.85	1401.17	72.08
			62.75	39.43
			431.35	50.85
				65.77
				107.91
				81.53
				73.75
	Mann Whitney test Ifnar1fl/fl + NaCl vs Ifnar1fl/fl + IFNa
	P value	0.0007
	Summary	***
