# Supplementary material for: Continuous sensing of IFNα by hepatic endothelial cells shapes a vascular antimetastatic barrier
Source: eLife journal article supplement (doi:10.7554/elife.80690), 2022-09-19
Supplement: fig5-data1 [file Figure 5 - Source data 1.xlsx]

## Sheet: File info
	Figure 5 - Source data 1
	Data for the graphs in the figure.

## Sheet: Figure 5A
	Figure 5-Source data 1
	Figure 5A. Total number of MC38GFP cells per area and total number of intravascular MC38GFP cells per tissue area
	# of total MC38GFP/mm2	Ifnar1_fl/fl + NaCl	Ifnar1_fl/fl + IFNa	VeCad_Ifnar_KO + NaCl	VeCad_Ifnar_KO + IFNa
		0.188	0.385	2.45	1.111
		0.403	0.262	3.118	1.284
		1.694	0.18	2.095	1.284
		0.801	0.339	1.853	1.932
		0.897	0.408	1.991	1.737
		0.637	0.293	2.626	3.589
		0.717			2.524
		p-values by Mann-Whitney test		Summary	p value
		Ifnar1_fl/fl + NaCl vs Ifnar1_fl/fl + IFNa		*	0.035
		Ifnar1_fl/fl + NaCl vs VeCad_Ifnar_KO + NaCl		**	0.0012
		Ifnar1_fl/fl + IFNa vs VeCad_Ifnar_KO + IFNa		**	0.0012
	Intravascular cells (%)	Ifnar1_fl/fl + NaCl	Ifnar1_fl/fl + IFNa	VeCad_Ifnar_KO + NaCl	VeCad_Ifnar_KO + IFNa
		12.5	66.7	16.66	15
		50	71.4	19.05	0
		0	71.4	0	22.22
		12.5	68.7	15	12.14
		p-values by Mann-Whitney test		Summary	p value
		Ifnar1_fl/fl + NaCl vs Ifnar1_fl/fl + IFNa		*	0.0286
		Ifnar1_fl/fl + NaCl vs VeCad_Ifnar_KO + NaCl		***	0.0001
		Ifnar1_fl/fl + IFNa vs VeCad_Ifnar_KO + IFNa		***	0.0001

## Sheet: Figure 5C
	Figure 5-Source data 1
	Figure 5C. Fenestrae frequency and percentage of vessel porosity in Ifnar1fl/fl and VeCad_Ifnar1_KO mice treated with NaCl or IFNα.
	Fenestrae Frequency/µm2	Ifnar1_fl/fl + NaCl	Ifnar1_fl/fl + IFNa	VeCad_Ifnar_KO + NaCl	VeCad_Ifnar_KO + IFNa
		6.58171	1.56519	11.2323	15.4002
		10.1092	5.17182	6.85059	15.7837
		9.71745	4.27196	6.32128	22.7325
		15.458	10.3561	16.28	17.9814
		8.01045	8.0441	10.1369	9.47397
		9.37531	4.19218	14.7732	8.87156
		7.0817	4.51942	7.87023	10.8216
		6.58264	1.97299	12.1019	9.47425
		7.36701	2.51925	15.9731	8.01036
		9.16253	2.75607	11.1061	15.9709
		10.3377	1.56185	4.98588	13.7675
		10.8069	3.5798	9.52281	10.9626
		8.42326	11.889	10.2272	10.6377
		10.3618	5.38118	5.21357	7.49898
		11.3751	3.72817	6.16651	9.51036
		14.0795	7.47477	2.38038	22.951
		14.5138	5.70152	7.52824	8.71877
		26.7474	4.58167	7.23653	8.05563
		17.3702	3.57747	7.34614	7.20421
		15.258	2.19099	4.83051	7.61799
		14.2266	3.06359	4.69732	6.41655
		12.0775		4.02312	1.56074
		p-values by Mann-Whitney test		Summary	p value
		Ifnar1_fl/fl + NaCl vs Ifnar1_fl/fl + IFNa		***	<0,0001
		Ifnar1_fl/fl + IFNa vs VeCad_Ifnar_KO + NaCl		***	0.0004
		Ifnar1_fl/fl + IFNa vs VeCad_Ifnar_KO + IFNa		***	<0,0001
	Porosity (%)	Ifnar1_fl/fl + NaCl	Ifnar1_fl/fl + IFNa	VeCad_Ifnar_KO + NaCl	VeCad_Ifnar_KO + IFNa
		4.05073	0.487291	4.49473	13.4245
		8.91502	2.1366	6.91906	10.9249
		8.91936	1.98093	5.36956	9.10713
		9.98395	3.44456	12.9833	9.4202
		5.01665	6.07646	10.4753	5.06955
		5.85885	1.75706	11.9153	5.64693
		5.19523	1.95201	8.34345	5.81206
		3.55687	1.22966	10.4758	5.43099
		3.54062	0.548031	8.21423	6.74476
		7.00054	0.589867	7.7859	10.1373
		11.429	0.261104	6.2297	8.18238
		9.02431	1.75544	7.11011	6.2589
		9.83745	9.76057	8.82736	6.58285
		9.75602	3.1568	4.61211	5.08051
		13.4828	1.41787	6.14153	3.86753
		11.9836	3.99965	3.85991	9.2284
		13.4559	2.3539	8.56283	3.66446
		16.8808	2.20045	7.19972	3.34838
		12.3829	0.778438	7.58173	4.02157
		9.58082	0.499169	7.5476	3.79889
		11.5671	1.37032	5.30253	4.17897
		12.2125		5.98778	0.616004
		p-values by Mann-Whitney test		Summary	p value
		Ifnar1_fl/fl + NaCl vs Ifnar1_fl/fl + IFNa		***	<0,0001
		Ifnar1_fl/fl + NaCl vs VeCad_Ifnar_KO + NaCl		***	<0,0001
		Ifnar1_fl/fl + IFNa vs VeCad_Ifnar_KO + IFNa		***	<0,0001

## Sheet: Figure 5E
	Figure 5-Source data 1
	Figure 5E. Ra coefficient quantification and percentage of hepatic area positive for HS staining in Ifnar1fl/fl and VeCadIfnar1_KO livers treated with NaCl or IFNα.
	Ra coefficient (µm)	Ifnar1_fl/fl + NaCl	Ifnar1_fl/fl + IFNa	VeCad_Ifnar_KO + NaCl	VeCad_Ifnar_KO + IFNa
		15.28	18.08	5.82	12.6
		11.09	15.23	11.38	15.13
		11.03	15.01	8.34	10.24
		17.2	16.18	10.63	11.03
		18.8	20.15	6.51	12.06
		13.22	19.76	15.19	8.65
		17.51	20.29	11.22	7.96
		11.33	13.45	9.54	6
		15.06	24.19	11.44	6.04
		18.47	24.05	13.35	8.8
		15.41	33.58	10.3	10.65
		16.58	25.5	8.74	10.42
		p-values by Mann-Whitney test		Summary	p value
		Ifnar1_fl/fl + NaCl vs Ifnar1_fl/fl + IFNa		*	0.0145
		Ifnar1_fl/fl + NaCl vs VeCad_Ifnar_KO + NaCl		***	0.0009
		Ifnar1_fl/fl + IFNa vs VeCad_Ifnar_KO + IFNa		***	<0,0001
	HS (%)	Ifnar1_fl/fl + NaCl	Ifnar1_fl/fl + IFNa	VeCad_Ifnar_KO + NaCl	VeCad_Ifnar_KO + IFNa
		0.71	3.124	2.126	4.893
		0.57	4.434	0.738	1.524
		3.05	5.006	0.998	2.805
		1.08	3.972
		1.22
		0.94
		p-values by Mann-Whitney test		Summary	p value
		Ifnar1_fl/fl + NaCl vs Ifnar1_fl/fl + IFNa		**	0.0095
