# Supplementary material for: Continuous sensing of IFNα by hepatic endothelial cells shapes a vascular antimetastatic barrier
Source: eLife journal article supplement (doi:10.7554/elife.80690), 2022-09-19

*Ifnar1<sup>fl/fl</sup>**VeCad<sup>Ifnar1\_KO</sup>*

Merge

NaCl

IFN $\alpha$ 

NaCl

IFN $\alpha$ 

Hoechst

CD31

HS

Day 7 after MOP implantation

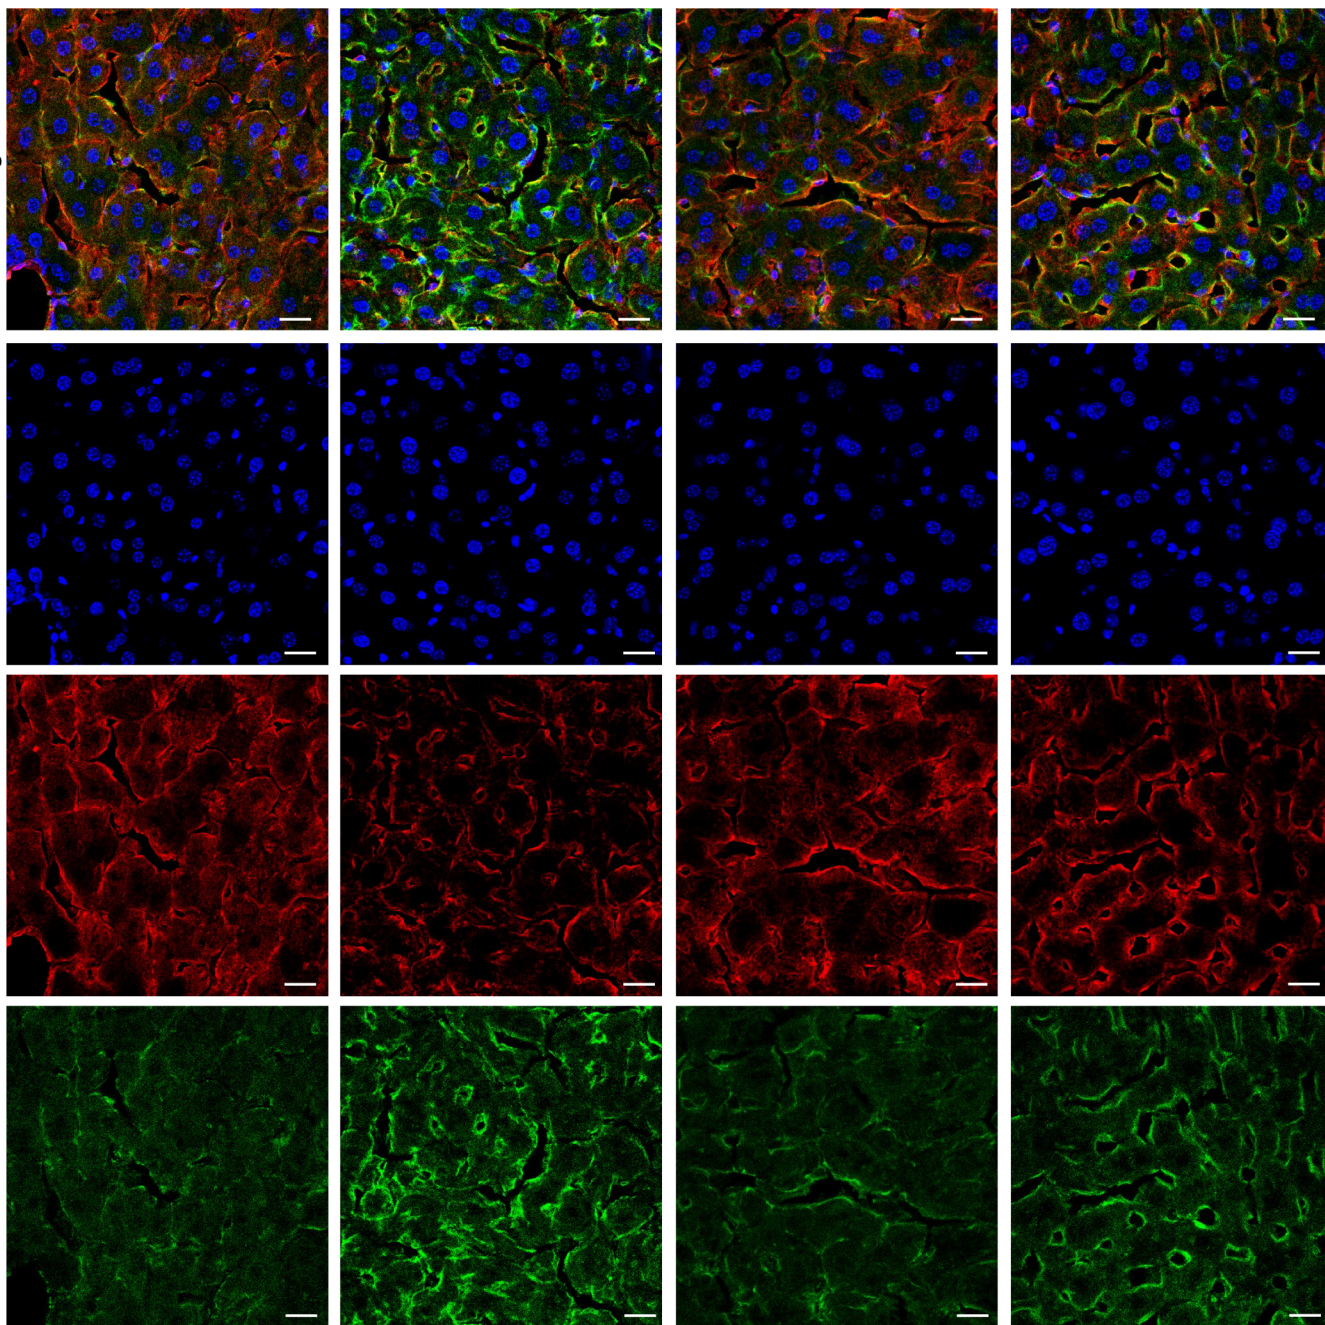

Supplement: fig5-data2 [file Figure 5 - Source data 2.pdf › Figure 5 - Source data 2/Figure 5 - Source data 2.pdf]
