# Supplementary material for: Continuous sensing of IFNα by hepatic endothelial cells shapes a vascular antimetastatic barrier
Source: eLife journal article supplement (doi:10.7554/elife.80690), 2022-09-19
Supplement: fig5-figsupp1-data1 [file Figure 5 - figure supplement 1 - source data 1.xlsx]

## Sheet: File info
	Figure 5 - figure supplement 1 - source data 1
	Data for the graphs in the figure.

## Sheet: 1B
	Figure 5 - figure supplement 1 - source data 1B. Hepatic sinusoids diameter from TEM images of Ifnar1fl/fl and VeCadIfnar1_KO mice after 7 days of NaCl or IFNα therapy
		Ifnar1fl/fl + NaCl	Ifnar1fl/fl + IFNa	VeCadIfnar1_KO + NaCl	VeCadIfnar1_KO + IFNa
		9.176	10.639	8.084	9.54
		10.827	10.432	9.434	7.761
		9.225	9.247	9.048	8.219
		9.063	9.849	7.426	7.621
		6.26	9.695	7.989	10.038
		6.4	10.418	7.026	6.2
		8.369	11.656	9.351	13.473
		9.451	10.235	8.113	10.551
		9.512	9.619	9.364	13.261
		8.231	7.647	10.087	10.725
		7.717	8.862	9.618	10.184
		6.252	7.744	6.513	11.666
		12.906	6.991	6.921	10.896
		7.176	9.119	8.043	10.162
		9.315	7.594	14.274	12.834
		6.885	7.835	9.97	9.462
		7.775	14.857	10.997	12.485
		9.635	10.029	11.334	8.222
		9.352	9.365	12.492	8.171
		5.597	8.971	17.238	14.99
		6.284	11.131	11.267	11.882
		8.251	9.979	10.829	10.981
		10.074	8.153	10.892	13.754
		13.789	9.974	8.176	7.445
		8.351	10.612	9.365	10.583
		11.013	9.547	9.795	8.607
		11.361	6.12	14.655	7.762
		7.848	7.368	10.492	9.318
		7.57	7.487	11.015	9.445
		9.231	10.857	7.499	10.376
		8.198	10.633	12.71	9.427
		6.464	8.058	10.699	8.182
			12.012	7.876	12.843
			8.056	12.511	10.244
			9.997	13.065	8.206
				10.992
				8.858
		p-values by Mann-Whitney test Ifnar1fl/fl + NaCl vs Ifnar1fl/fl + IFNa
		Summary	p value
		*	0.0451
		p-values by Mann-Whitney test Ifnar1fl/fl + NaCl vs Ifnar1fl/fl + IFNa
		Summary	p value
		*	0.0178

## Sheet: 1C
	Figure 5 - figure supplement 1 - source data 1C. Percentage of ITGB2+ and ITGA4+ cells within the hepatic CD31+ non-parenchymal cells population of Ifnar1fl/fl and VeCadIfnar1_KO mice treated with NaCl or IFNα therapy
	% ITGB2 within CD31	Ifnar1fl/fl + NaCl	Ifnar1fl/fl + IFNa	VeCadIfnar1_KO + NaCl	VeCadIfnar1_KO + IFNa
		12.6	26	7.51	24.4
		12.4	28.3	7.13	19.9
		10.2	27.4	9.08	25.1
		9.52	31.8	11.3	12.2
		12	26.4	5.35	14.6
		p-values by Mann-Whitney test Ifnar1fl/fl-NaCl vs Ifnar1fl/fl-IFNa
		Summary	p value
		****	<0,0001
		p-values by Mann-Whitney test VeCadIfnar1_KO-NaCl vs VeCadIfnar1_KO-IFNa
		Summary	p value
		**	0.0037
		p-values by Mann-Whitney test Ifnar1fl/fl-IFNa vs VeCadIfnar1_KO-IFNa
		Summary	p value
		**	0.0079
	% ITGA4 within CD31	Ifnar1fl/fl + NaCl	Ifnar1fl/fl + IFNa	VeCadIfnar1_KO + NaCl	VeCadIfnar1_KO + IFNa
		2.46	29.9	5.69	28.2
		7.84	32.9	1.9	21.1
		3.59	30.9	1.9	29.9
		1.6	33.6	10.5	11.3
		7.96	34.9	10.1	11.6
		p-values by Mann-Whitney test Ifnar1fl/fl-NaCl vs Ifnar1fl/fl-IFNa
		Summary	p value
		****	<0,0001
		p-values by Mann-Whitney test VeCadIfnar1_KO-NaCl vs VeCadIfnar1_KO-IFNa
		Summary	p value
		*	0.011
		p-values by Mann-Whitney test Ifnar1fl/fl-IFNa vs VeCadIfnar1_KO-IFNa
		Summary	p value
		*	0.0159

## Sheet: 1F
	Figure 5 - figure supplement 1 - source data 1F. Percentage of Collagen type IV or Laminin-α1 staining on Ifnar1fl/fl and VeCadIfnar1_KO livers treated with NaCl or IFNα therapy
	Coll IV (%)	Ifnar1fl/fl + NaCl	Ifnar1fl/fl + IFNa	VeCadIfnar1_KO + NaCl	VeCadIfnar1_KO + IFNa
		6.816	18.09	9.888	13.883
		9.886	17.214	8.342	12.752
		5.62	28.634	7.665	10.698
		7.727	26.014	5.861	14.397
		p-values by Mann-Whitney test Ifnar1fl/fl-NaCl vs Ifnar1fl/fl-IFNa
		Summary	p value
		***	0.0001
		p-values by Mann-Whitney test Ifnar1fl/fl-NaCl vs VeCadIfnar1_KO-IFNa
		Summary	p value
		**	0.0057
	Laminin (%)	Ifnar1fl/fl + NaCl	Ifnar1fl/fl + IFNa	VeCadIfnar1_KO + NaCl	VeCadIfnar1_KO + IFNa
		3.693	15.282	7.776	11.564
		3.886	19.505	5.46	10.947
		6.076	17.5	3.845	14.768
		4.012	20.65	5.167	14.586
		p-values by Mann-Whitney test Ifnar1fl/fl-NaCl vs Ifnar1fl/fl-IFNa
		Summary	p value
		****	<0,0001
		p-values by Mann-Whitney test VeCadIfnar1_KO-NaCl vs VeCadIfnar1_KO-IFNa
		Summary	p value
		***	0.0005
		p-values by Mann-Whitney test Ifnar1fl/fl-IFNa vs VeCadIfnar1_KO-IFNa
		Summary	p value
		**	0.0074

## Sheet: 1H
	Figure 5 - figure supplement 1 - source data 1H. Percentage of ICAM1 or E-selectin staining on Ifnar1fl/fl and VeCadIfnar1_KO livers treated with NaCl or IFNα therapy
	ICAM1 (%)	Ifnar1fl/fl + NaCl	Ifnar1fl/fl + IFNa	VeCadIfnar1_KO + NaCl	VeCadIfnar1_KO + IFNa
		4.547	21.803	6.008	11.975
		6.397	14.862	5.421	8.658
		9.286	9.595	5.833	14.543
		4.406	13.778	4.705	10.878
		p-values by Mann-Whitney test Ifnar1fl/fl-NaCl vs Ifnar1fl/fl-IFNa
		Summary	p value
		**	0.0069
	E-selectin (%)	Ifnar1fl/fl + NaCl	Ifnar1fl/fl + IFNa	VeCadIfnar1_KO + NaCl	VeCadIfnar1_KO + IFNa
		1.747	11.61	3.313	2.075
		4.798	7.485	3.264	3.286
		3.53	7.86	4.0275	3.757
		4	7.491	3.512	2.654
		p-values by Mann-Whitney test Ifnar1fl/fl-NaCl vs Ifnar1fl/fl-IFNa
		Summary	p value
		*	0.0286
		p-values by Mann-Whitney test Ifnar1fl/fl-IFNa vs VeCadIfnar1_KO-IFNa
		Summary	p value
		*	0.0286
