# Supplementary material for: Continuous sensing of IFNα by hepatic endothelial cells shapes a vascular antimetastatic barrier
Source: eLife journal article supplement (doi:10.7554/elife.80690), 2022-09-19
Supplement: fig5-figsupp1-data2 [file Figure 5 - figure supplement 1 - source data 2.pdf › Figure 5 - figure supplement 1 - source data 2/Figure 5 - figure supplement 1 - source data 2.pdf]

*Ifnar1<sup>fl/fl</sup>*VeCad<sup>*Ifnar1*<sup>-/-</sup></sup>

NaCl

IFN $\alpha$ 

NaCl

IFN $\alpha$ 

Merge

Hoechst

CD31

Coll IV

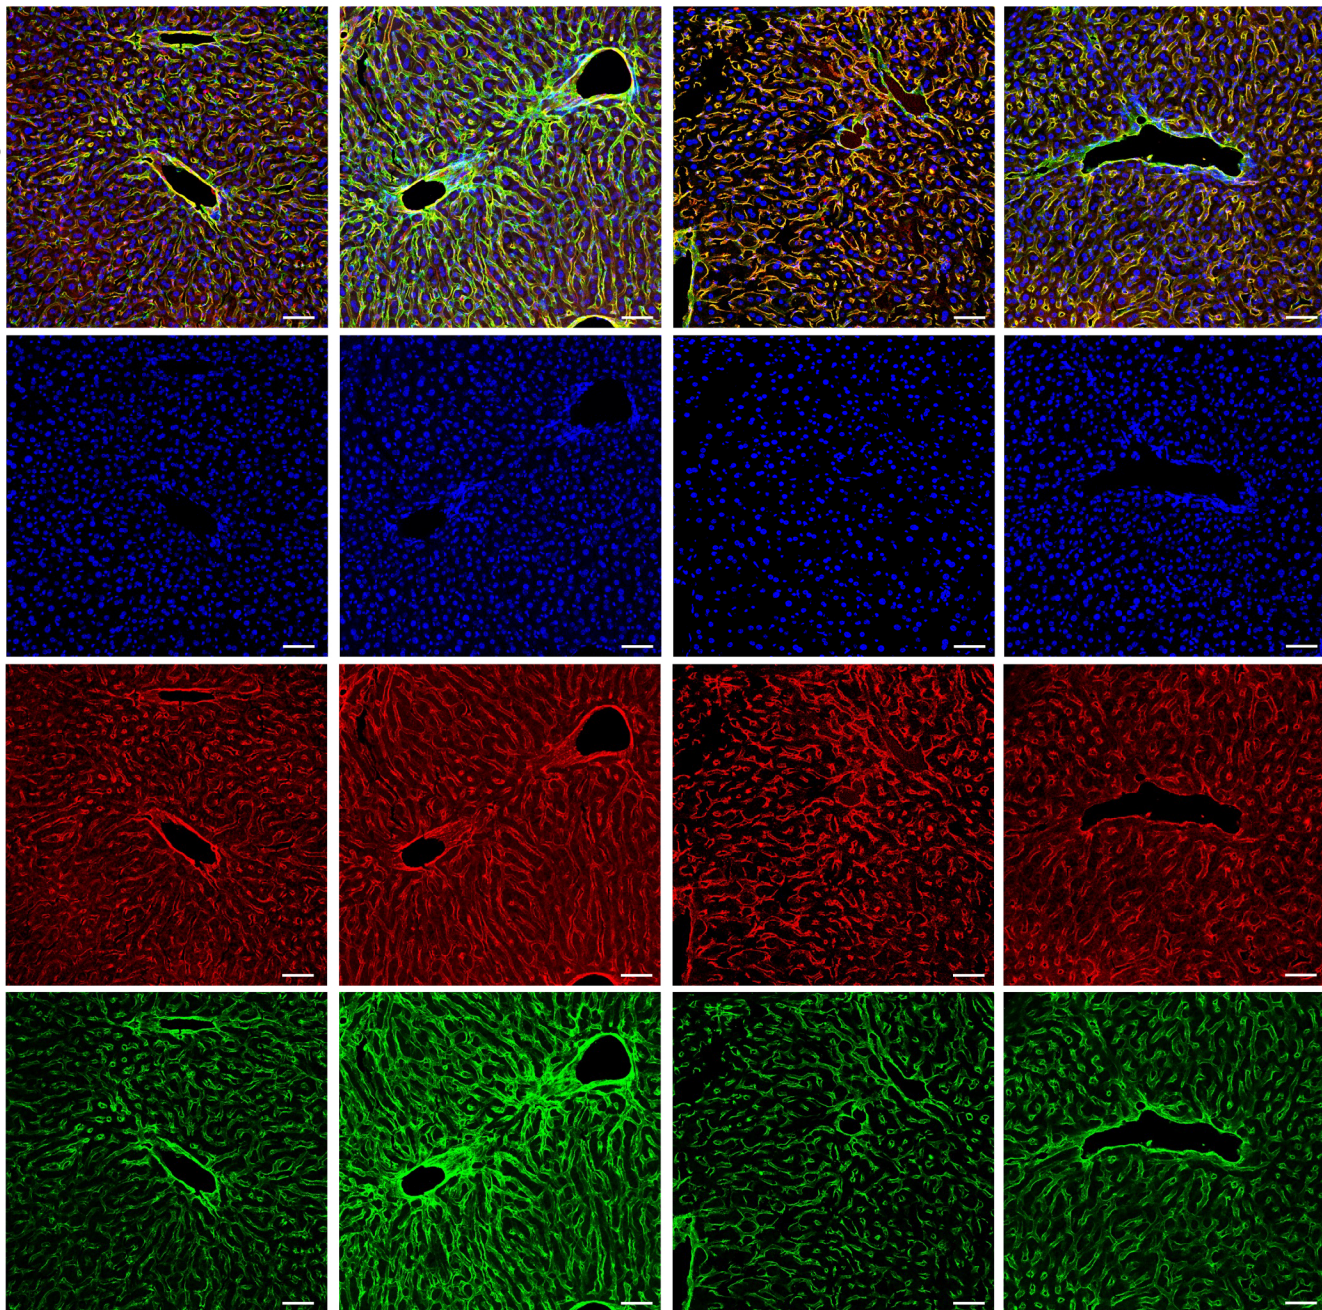

Day 7 after MOP implantation
