# Supplementary material for: Continuous sensing of IFNα by hepatic endothelial cells shapes a vascular antimetastatic barrier
Source: eLife journal article supplement (doi:10.7554/elife.80690), 2022-09-19
Supplement: fig5-figsupp1-data5 [file Figure 5 - figure supplement 1 - source data 5.pdf › Figure 5 - figure supplement 1 - source data 5/Figure 5 - figure supplement 1 - source data 5.pdf]

*Ifnar1<sup>fl/fl</sup>*VeCad<sup>-/-</sup>*Ifnar1<sup>fl/fl</sup>*

Merge

NaCl

IFN $\alpha$ 

NaCl

IFN $\alpha$ 

Hoechst

CD31

E-Selectin

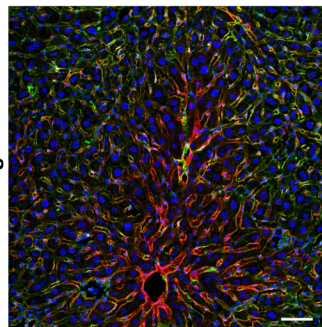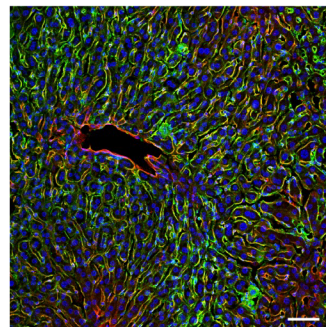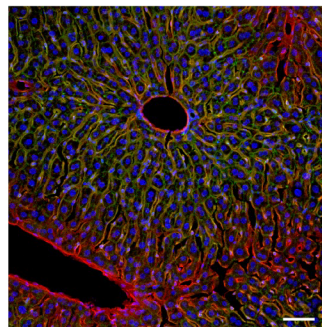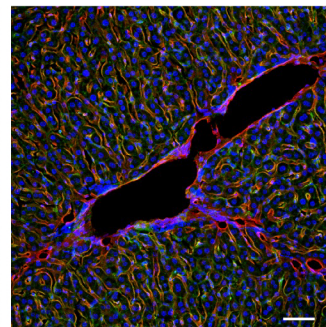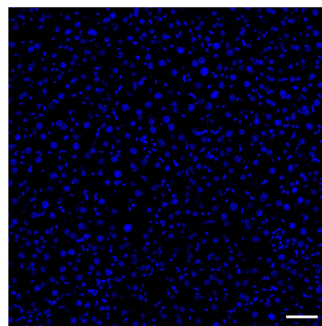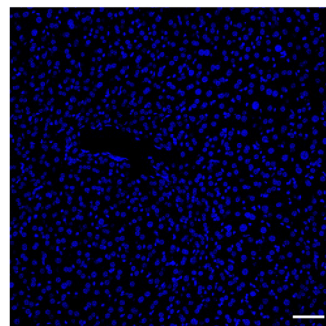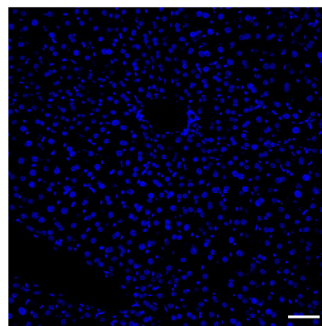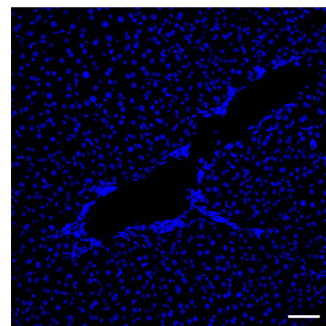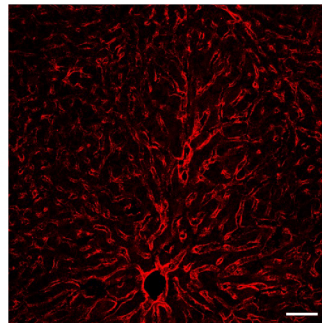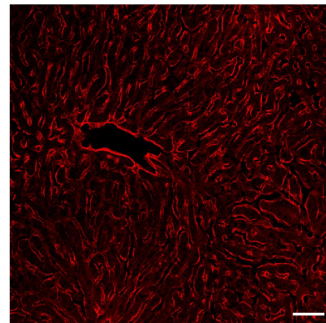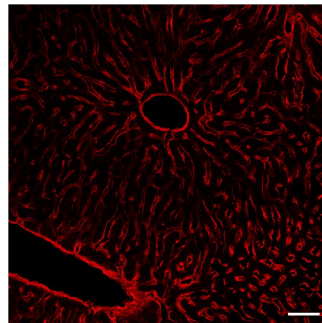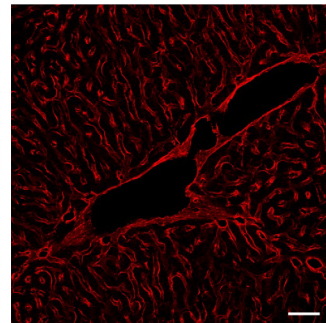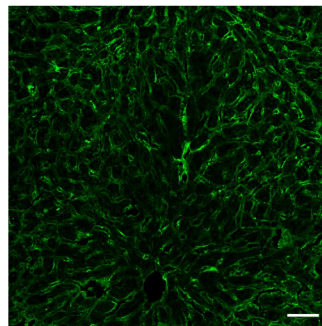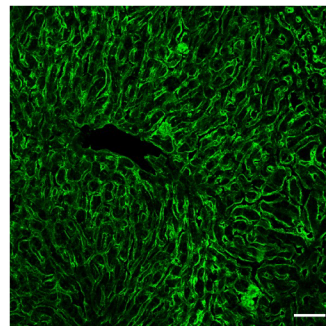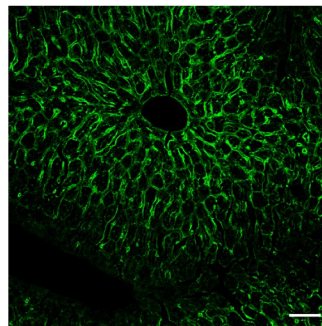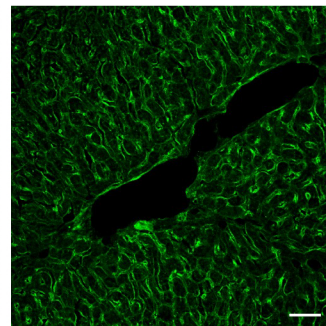

Day 7 after MOP implantation
