# Supplementary material for: Continuous sensing of IFNα by hepatic endothelial cells shapes a vascular antimetastatic barrier
Source: eLife journal article supplement (doi:10.7554/elife.80690), 2022-09-19
Supplement: fig5-figsupp2-data1 [file elife-80690-fig5-figsupp2-data1-v1.zip]

*Ifnar1<sup>fl/m</sup>**VeCad<sup>Ifnar1\_KO</sup>*

NaCl

IFN $\alpha$ 

NaCl

IFN $\alpha$ 

Merge

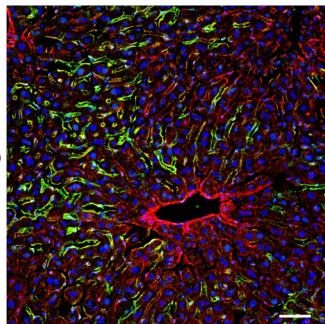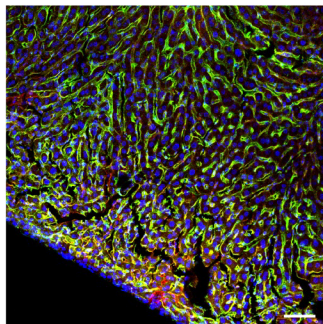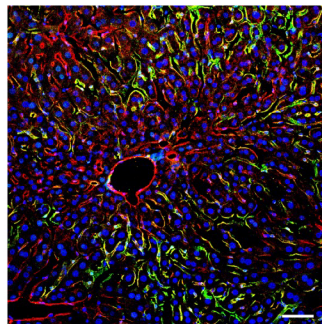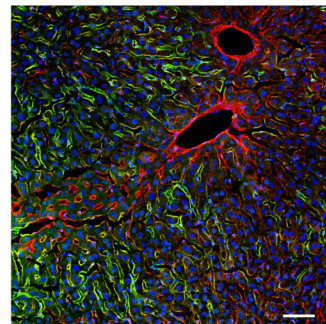

Hoechst

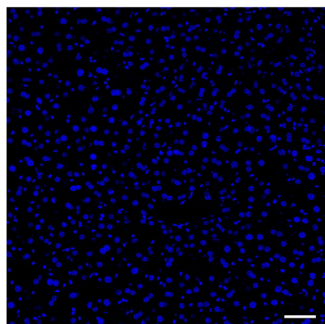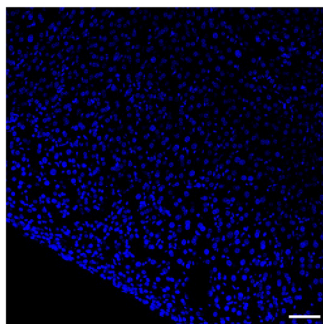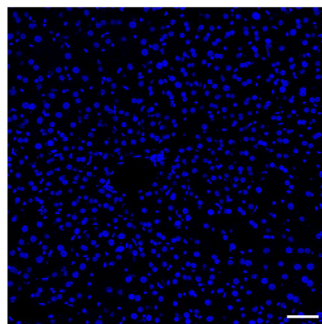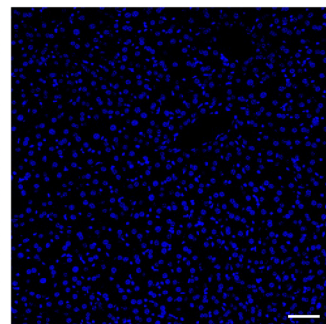

CD31

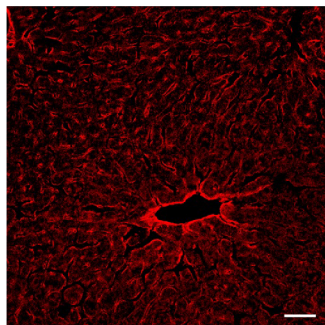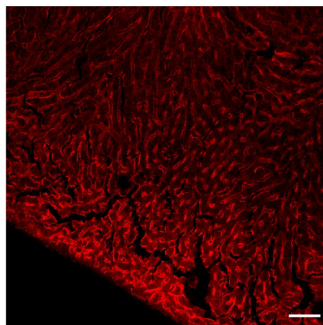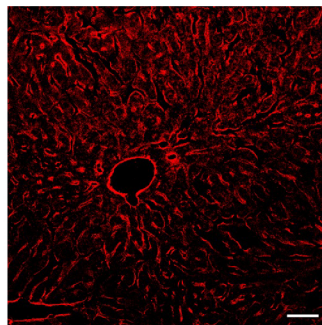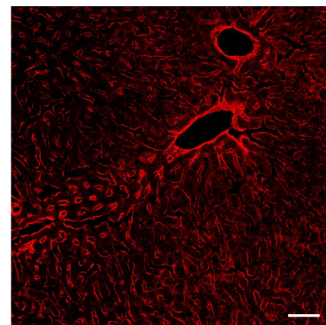

Lyve-1

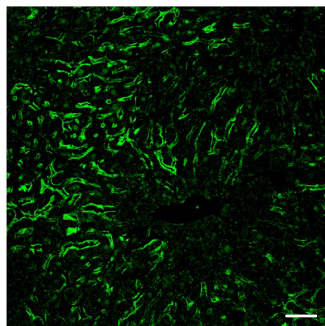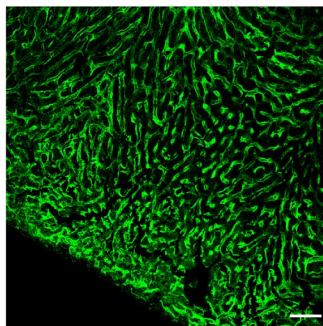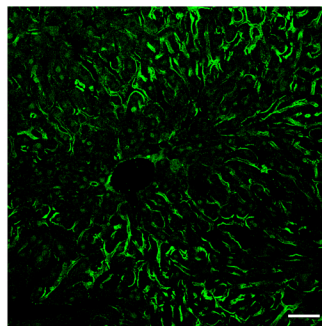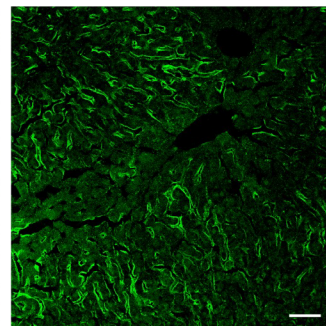

Day 7 after MOP implantation
