# Supplementary material for: Continuous sensing of IFNα by hepatic endothelial cells shapes a vascular antimetastatic barrier
Source: eLife journal article supplement (doi:10.7554/elife.80690), 2022-09-19
Supplement: fig5-figsupp2-data2 [file Figure 5 - figure supplement 2 - source data 2.xlsx]

## Sheet: File info
	Figure 5 - figure supplement 2 - source data 2
	Excel file of the source 2 data for figure 5 - supplement 2

## Sheet: 2B
	Figure 5 - figure supplement 2 - source data 2
	Figure 5 - figure supplement 2 - source data 2B. Percentage of hepatic area positive for Lyve-1 staining from Ifnar1fl/fl and VeCadIfnar1_KO mice treated with NaCl or IFNα therapy
	Lyve-1 (%)	Ifnar1fl/fl + NaCl	Ifnar1fl/fl + IFNa	VeCadIfnar1_KO + NaCl	VeCadIfnar1_KO + IFNa
		5.18131	20.6254	4.87165	8.43737
		8.30915	15.8961	5.42603	2.90613
		4.69198	14.4226	5.59187	4.40226
		2.86283	15.0859	4.1604	6.75802
		3.36771	9.41364	3.0982	4.70963
		4.24442	9.46732	5.33191	3.1621
		3.10656	11.6165	8.7697	5.10063
		7.67803	16.8882	6.34136	3.7137
				4.8604
				6.003
		p-values by Mann-Whitney test Ifnar1fl/fl-NaCl vs Ifnar1fl/fl-IFNa
		Summary	p value
		***	0.0002
		p-values by Mann-Whitney test Ifnar1fl/fl-IFNa vs VeCadIfnar1_KO-IFNa
		Summary	p value
		***	0.0002

## Sheet: 2D
	Figure 5 - figure supplement 2 - source data 2
	Figure 5 - figure supplement 2 - source data 2D. Fenestrae frequency and percentage of vessel porosity quantified in liver sections of mice after 40days of IFNa therapy discontinuation
	Fenestrae Frequency/µm2	IFNa1 (Day 40 after therapy discontinuation)
		2.266
		3.634
		4.148
		9.969
		6.111
		9.011
	Porosity (%)	IFNa1 (Day 40 after therapy discontinuation)
		4.119
		4.369
		5.127
		10.16
		7.493
		9.61

## Sheet: 2E
	Figure 5 - figure supplement 2 - source data 2
	Figure 5 - figure supplement 2 - source data 2E. White blood cell counts of NaCl-treated control mice and mice after 40days of IFNa therapy discontinuation
	WBC (K/μl)	NaCl	IFNa1 (Day 40 after therapy discontinuation)
		10.1	7.62
		5.76	10.28
		8.73	11.15

## Sheet: 2F
	Figure 5 - figure supplement 2 - source data 2
	Figure 5 - figure supplement 2 - source data 2F. Platelets count of NaCl-treated control mice and mice after 40days of IFNa therapy discontinuation
	PLT (K/μl)	NaCl	IFNa1 (Day 40 after therapy discontinuation)
		765	780
		860	916
		1104	788

## Sheet: 2G
	Figure 5 - figure supplement 2 - source data 2
	Figure 5 - figure supplement 2 - source data 2G. Hematocrit of NaCl-treated control mice and mice after 40days of IFNa therapy discontinuation
	HCT (%)	NaCl	IFNa1 (Day 40 after therapy discontinuation)
		48.3	43.1
		45.6	46.1
		44	46.4

## Sheet: 2H
	Figure 5 - figure supplement 2 - source data 2
	Figure 5 - figure supplement 2 - source data 2H. serum Alanine Aminotransferases quantification of NaCl-treated control mice and mice after 40days of IFNa therapy discontinuation
	sALT (U/l)	NaCl	IFNa1 (Day 40 after therapy discontinuation)
		34	33
		69	29
		31	29
