# Supplementary material for: Continuous sensing of IFNα by hepatic endothelial cells shapes a vascular antimetastatic barrier
Source: eLife journal article supplement (doi:10.7554/elife.80690), 2022-09-19
Supplement: fig6-data1 [file Figure 6 - Source data 1.xlsx]

## Sheet: File info
	Figure 6 - Source data 1
	Figure 6-source data 1 Gene Ontology (GO) of biological process enrichment analysis of all differentially expressed genes. Excel spreadsheet with all significant pathways found in the comparison between IFNα-treated Ifnar1fl/fl vs NaCl-treated Ifnar1fl/fl HECs/LSECs and NaCl-treated VeCadIfnar1_KO-NaCl vs NaCl-treated Ifnar1fl/fl LSECs were generated using GO Biological Processes 2018 collection.

## Sheet: UP_IFN-IfnarWTvsNaCl-IfnarWT 
Upregulated GO pathways for the comparison IFNα-Ifnar1fl/fl LSEC vs NaCl-Ifnar1fl/fl LSEC with FDR<0.05 (Biological Processes collection 2018)
Term	Overlap	P.value	Adjusted.P.value	Old.P.value	Old.Adjusted.P.value	Odds.Ratio	Combined.Score	Genes
cellular response to type I interferon (GO:0071357)	24/65	1.19089e-27	7.5026e-25	0	0	42.1592	2613.66	IFITM3;SP100;RSAD2;STAT1;MX2;STAT2;MX1;ADAR;ISG15;IFI35;IFIT1;SAMHD1;IFIT3;PSMB8;IFIT2;BST2;ISG20;OAS2;IRF1;OAS3;IRF7;GBP2;XAF1;IRF9
type I interferon signaling pathway (GO:0060337)	24/65	1.19089e-27	7.5026e-25	0	0	42.1592	2613.66	IFITM3;SP100;RSAD2;STAT1;MX2;STAT2;MX1;ADAR;ISG15;IFI35;IFIT1;SAMHD1;IFIT3;PSMB8;IFIT2;BST2;ISG20;OAS2;IRF1;OAS3;IRF7;GBP2;XAF1;IRF9
negative regulation of viral life cycle (GO:1903901)	15/61	1.00994e-14	4.24175e-12	0	0	22.7301	732.507	IFITM3;RSAD2;MX1;EIF2AK2;ISG15;ZC3HAV1;IFIT1;PML;BST2;ISG20;PARP10;TRIM6;OAS2;OAS3;TRIM21
regulation of viral genome replication (GO:0045069)	15/63	1.70268e-14	5.36344e-12	0	0	21.7808	690.538	IFITM3;TOP2A;RSAD2;MX1;EIF2AK2;ADAR;ISG15;ZC3HAV1;IFIT1;BST2;ISG20;PARP10;TRIM6;OAS2;OAS3
negative regulation of viral genome replication (GO:0045071)	13/50	2.85096e-13	7.18441e-11	0	0	24.3298	702.791	IFITM3;RSAD2;MX1;EIF2AK2;ISG15;ZC3HAV1;IFIT1;BST2;ISG20;PARP10;TRIM6;OAS2;OAS3
regulation of type I interferon production (GO:0032479)	15/85	1.87104e-12	3.92919e-10	0	0	14.9187	402.872	ZBP1;UBA7;DDX58;TREX1;NLRC5;UBE2L6;ISG15;IFIH1;RNF135;IRF1;DHX58;IRF7;TRIM25;TRIM21;TRIM56
cytokine-mediated signaling pathway (GO:0019221)	36/633	5.21934e-12	9.39482e-10	0	0	4.41426	114.676	IFITM3;SP100;CXCL9;LRRC4;ADAR;IFI35;IFIT1;SAMHD1;LRP8;IFIT3;IFIT2;IL18RAP;TRIM25;GBP2;TRIM21;B2M;IL33;RSAD2;STAT1;STAT2;MX2;MX1;ISG15;TNFRSF1B;PSMB8;PML;PSMB9;BST2;ISG20;CXCL10;OAS2;OAS3;IRF1;IRF7;XAF1;IRF9
response to cytokine (GO:0034097)	16/138	2.45781e-10	3.87106e-08	0	0	9.13879	202.21	IFITM3;CD274;SP100;STAT1;MX2;MX1;TRAFD1;EIF2AK2;ISG15;ADAR;PML;BST2;LGALS9;XAF1;TRIM21;TRIM56
interferon-gamma-mediated signaling pathway (GO:0060333)	12/70	4.54756e-10	6.36658e-08	0	0	14.2613	306.779	SP100;OAS2;STAT1;IRF1;OAS3;IRF7;TRIM25;GBP2;B2M;TRIM21;IRF9;PML
cellular response to interferon-gamma (GO:0071346)	14/116	1.9469e-09	2.4531e-07	0	0	9.50648	190.672	GBP6;SP100;STAT1;PML;OAS2;IRF1;OAS3;IRF7;TRIM25;LGALS9;GBP2;B2M;TRIM21;IRF9
positive regulation of interferon-beta production (GO:0032728)	8/26	2.66567e-09	3.0534e-07	0	0	30.273	597.674	IFIH1;RNF135;DDX58;IRF1;TLR9;IRF7;TLR7;TLR3
positive regulation of interferon-alpha production (GO:0032727)	7/19	6.41728e-09	6.73815e-07	0	0	39.6083	747.182	IFIH1;DDX58;STAT1;TLR9;IRF7;TLR7;TLR3
negative regulation of type I interferon production (GO:0032480)	9/44	1.39842e-08	1.28799e-06	0	0	17.5607	317.591	IFIH1;RNF135;UBA7;DDX58;DHX58;NLRC5;TRIM25;UBE2L6;ISG15
response to type I interferon (GO:0034340)	5/7	1.4311e-08	1.28799e-06	0	0	168.673	3046.61	SP100;MX1;ISG15;IFIT1;TRIM56
positive regulation of type I interferon production (GO:0032481)	10/62	2.43763e-08	2.04761e-06	0	0	13.1674	230.82	IFIH1;ZBP1;RNF135;DDX58;STAT1;IRF1;DHX58;TLR9;IRF7;TLR3
regulation of innate immune response (GO:0045088)	10/69	7.03441e-08	5.29821e-06	0	0	11.601	191.067	RNF135;GBP5;STAT1;IRF1;STAT2;DHX58;TRAFD1;PARP9;SAMHD1;USP18
positive regulation of innate immune response (GO:0045089)	8/38	7.14838e-08	5.29821e-06	0	0	18.1527	298.681	ZBP1;GBP5;TRIM6;DHX58;NLRC5;TLR9;DDX60;TLR3
negative regulation of cytokine production (GO:0001818)	12/110	8.86492e-08	6.20545e-06	0	0	8.4232	136.781	IFIH1;RNF135;CD274;UBA7;DDX58;DHX58;TLR9;NLRC5;TRIM25;UBE2L6;ISG15;LGALS9
response to interferon-beta (GO:0035456)	6/19	2.35107e-07	1.55913e-05	0	0	31.2292	476.658	IFITM3;BST2;TRIM6;STAT1;IRF1;XAF1
regulation of interferon-beta production (GO:0032648)	7/34	5.66054e-07	3.56614e-05	0	0	17.5903	253.029	IFIH1;RNF135;DDX58;IRF1;TLR9;IRF7;TLR3
response to interferon-alpha (GO:0035455)	5/17	3.73223e-06	0.000223934	0	0	28.0979	351.182	IFITM3;BST2;MX2;EIF2AK2;ADAR
regulation of defense response to virus by host (GO:0050691)	6/30	4.48431e-06	0.000256829	0	0	16.9064	208.201	TRIM6;DTX3L;DDX58;STAT1;IFIT1;PARP9
regulation of cytokine production (GO:0001817)	10/108	4.81356e-06	0.000263699	0	0	6.97042	85.3463	ZBP1;IFIH1;IL33;DDX58;TREX1;IRF7;EIF2AK2;ISG15;TRIM21;TRIM56
regulation of chemokine production (GO:0032642)	5/18	5.10506e-06	0.000268016	0	0	25.9352	316.028	TLR9;EIF2AK2;TLR7;LGALS9;TLR3
positive regulation of chemokine production (GO:0032722)	6/34	9.66247e-06	0.000486989	0	0	14.4882	167.299	IL33;TLR9;EIF2AK2;TLR7;LGALS9;TLR3
positive regulation of defense response to virus by host (GO:0002230)	5/21	1.16892e-05	0.000566479	0	0	21.0691	239.279	TRIM6;DTX3L;STAT1;DDX58;PARP9
regulation of type I interferon-mediated signaling pathway (GO:0060338)	6/39	2.2024e-05	0.00102779	0	0	12.2899	131.789	ZBP1;TRIM6;STAT1;STAT2;NLRC5;USP18
positive regulation of cytokine production (GO:0001819)	13/220	2.68199e-05	0.0012069	0	0	4.31122	45.3815	ZBP1;GBP5;IL33;DDX58;EIF2AK2;DDX60;IRF1;DHX58;TLR9;IRF7;TLR7;LGALS9;TLR3
translesion synthesis (GO:0019985)	6/42	3.41127e-05	0.00148214	0	0	11.264	115.86	UBA7;PCLAF;TRIM25;UBE2L6;ISG15;DTL
DNA synthesis involved in DNA repair (GO:0000731)	7/65	4.94459e-05	0.00207673	0	0	8.17568	81.0589	CDKN2D;UBA7;PCLAF;TRIM25;UBE2L6;ISG15;DTL
positive regulation of NF-kappaB import into nucleus (GO:0042346)	4/15	5.7166e-05	0.00232352	0	0	24.4393	238.761	TLR9;TLR7;LGALS9;TLR3
positive regulation of tumor necrosis factor production (GO:0032760)	6/47	6.56139e-05	0.00245668	0	0	9.88786	95.2371	IFIH1;SPN;DDX58;TLR9;LGALS9;TLR3
postreplication repair (GO:0006301)	6/47	6.56139e-05	0.00245668	0	0	9.88786	95.2371	UBA7;PCLAF;TRIM25;UBE2L6;ISG15;DTL
response to interferon-gamma (GO:0034341)	7/68	6.62913e-05	0.00245668	0	0	7.77241	74.7819	IFITM3;GBP6;BST2;SP100;STAT1;LGALS9;TRIM21
regulation of interferon-alpha production (GO:0032647)	4/16	7.53326e-05	0.00271197	0	0	22.4016	212.672	IFIH1;STAT1;DDX58;IRF7
positive regulation of transcription factor import into nucleus (GO:0042993)	5/32	0.000101195	0.00354183	0	0	12.4784	114.782	DDX58;TLR9;TLR7;LGALS9;TLR3
positive regulation of type I interferon-mediated signaling pathway (GO:0060340)	3/7	0.000108556	0.00369678	0	0	50.2526	458.717	ZBP1;TRIM6;NLRC5
positive regulation of cytokine-mediated signaling pathway (GO:0001961)	5/33	0.000117827	0.0039069	0	0	12.0322	108.846	ZBP1;TRIM6;NLRC5;PARP14;PARP9
regulation of toll-like receptor signaling pathway (GO:0034121)	4/20	0.000191361	0.00618243	0	0	16.7978	143.812	IRF1;TLR9;IRF7;TLR3
negative regulation of viral process (GO:0048525)	4/21	0.000233637	0.00735956	0	0	15.8089	132.19	IFITM3;STAT1;TRIM14;TRIM21
regulation of interferon-gamma-mediated signaling pathway (GO:0060334)	4/22	0.000282235	0.00867358	0	0	14.9298	122.018	STAT1;NLRC5;PARP14;PARP9
I-kappaB phosphorylation (GO:0007252)	3/10	0.000360062	0.0108019	0	0	28.7114	227.659	TLR9;TLR7;TLR3
positive regulation of interleukin-6 production (GO:0032755)	5/43	0.000423369	0.0124057	0	0	8.8613	68.8281	IFIH1;DDX58;TLR9;LGALS9;TLR3
regulation of viral release from host cell (GO:1902186)	4/25	0.000471262	0.0125911	0	0	12.7951	98.0114	TRIM25;CHMP4B;TRIM21;PML
positive regulation of viral life cycle (GO:1903902)	5/44	0.000471907	0.0125911	0	0	8.63365	66.1228	TOP2A;CHMP4B;ADAR;LGALS9;IFIT1
positive regulation of interleukin-8 production (GO:0032757)	5/44	0.000471907	0.0125911	0	0	8.63365	66.1228	DDX58;TLR9;TLR7;LGALS9;TLR3
cellular response to interferon-beta (GO:0035458)	3/11	0.000489654	0.0125911	0	0	25.1212	191.469	TRIM6;STAT1;IRF1
positive regulation of tumor necrosis factor secretion (GO:1904469)	3/11	0.000489654	0.0125911	0	0	25.1212	191.469	IFIH1;DDX58;LGALS9
positive regulation of interferon-gamma biosynthetic process (GO:0045078)	3/11	0.000489654	0.0125911	0	0	25.1212	191.469	TLR9;TLR7;TLR3
negative regulation of macromolecule metabolic process (GO:0010605)	8/124	0.000534984	0.0134816	0	0	4.67414	35.2116	PARP10;MSR1;TRIM6;RBL1;LGALS9;PARP14;PARP9;XDH
regulation of NF-kappaB import into nucleus (GO:0042345)	4/26	0.000550482	0.0136002	0	0	12.2128	91.6539	TLR9;TLR7;LGALS9;TLR3
positive regulation of cytokine secretion (GO:0050715)	6/73	0.000753707	0.0182629	0	0	6.04278	43.4506	IFIH1;CD274;IL33;TRIM6;DDX58;LGALS9
cellular response to exogenous dsRNA (GO:0071360)	3/13	0.000830234	0.0197376	0	0	20.0949	142.549	IFIH1;DDX58;IFIT1
regulation of interferon-gamma biosynthetic process (GO:0045072)	3/14	0.00104509	0.0243855	0	0	18.2672	125.379	TLR9;TLR7;TLR3
NAD biosynthesis via nicotinamide riboside salvage pathway (GO:0034356)	3/15	0.00129208	0.0290718	0	0	16.744	111.373	PARP10;NAMPT;PARP9
regulation of tumor necrosis factor secretion (GO:1904467)	3/15	0.00129208	0.0290718	0	0	16.744	111.373	IFIH1;DDX58;LGALS9
response to exogenous dsRNA (GO:0043330)	4/33	0.00138872	0.0306981	0	0	9.26162	60.9356	IFIH1;DDX58;IFIT1;TLR3
cellular defense response (GO:0006968)	5/56	0.00143615	0.0311992	0	0	6.59817	43.1902	LGALS3BP;SPN;CXCL9;NCF1;TCIRG1
regulation of interleukin-8 production (GO:0032677)	4/34	0.00155569	0.0330302	0	0	8.95245	57.885	DDX58;TLR9;TLR7;TLR3
cellular response to dsRNA (GO:0071359)	3/16	0.00157287	0.0330302	0	0	15.4553	99.7615	IFIH1;DDX58;IFIT1
protein deubiquitination (GO:0016579)	11/257	0.00167211	0.0345387	0	0	3.04206	19.4499	IFIH1;RNF135;CCNA2;IL33;USP25;DDX58;KEAP1;TRIM25;USP18;PSMB8;PSMB9
protein modification by small protein removal (GO:0070646)	11/261	0.00188799	0.0366185	0	0	2.99277	18.7714	IFIH1;RNF135;CCNA2;IL33;USP25;DDX58;KEAP1;TRIM25;USP18;PSMB8;PSMB9
positive regulation of lymphocyte migration (GO:2000403)	3/17	0.00188905	0.0366185	0	0	14.3506	90.0023	SPN;CXCL10;DOCK8
positive regulation of interleukin-6 secretion (GO:2000778)	3/17	0.00188905	0.0366185	0	0	14.3506	90.0023	IFIH1;DDX58;LGALS9
regulation of T cell migration (GO:2000404)	3/17	0.00188905	0.0366185	0	0	14.3506	90.0023	SPN;CXCL10;DOCK8
protein monoubiquitination (GO:0006513)	4/37	0.00213961	0.0408471	0	0	8.13735	50.0213	DTX3L;TRIM25;TRIM21;DTL
positive regulation of response to external stimulus (GO:0032103)	6/90	0.00223576	0.0420456	0	0	4.81566	29.3908	IL33;DHX58;TLR9;TLR7;DDX60;TLR3
protein ADP-ribosylation (GO:0006471)	3/19	0.00263347	0.0480895	0	0	12.5555	74.5727	PARP10;PARP14;PARP9
positive regulation of toll-like receptor signaling pathway (GO:0034123)	3/19	0.00263347	0.0480895	0	0	12.5555	74.5727	RSAD2;TLR9;TLR3
positive regulation of cytokine biosynthetic process (GO:0042108)	4/40	0.00285944	0.0499157	0	0	7.4581	43.683	SPN;TLR9;TLR7;TLR3
negative regulation of innate immune response (GO:0045824)	3/20	0.00306443	0.0499157	0	0	11.8163	68.3916	DHX58;NLRC5;TRAFD1
positive regulation of T cell migration (GO:2000406)	3/20	0.00306443	0.0499157	0	0	11.8163	68.3916	SPN;CXCL10;DOCK8
regulation of response to cytokine stimulus (GO:0060759)	3/20	0.00306443	0.0499157	0	0	11.8163	68.3916	IFIH1;DDX58;PARP9
positive regulation of I-kappaB kinase/NF-kappaB signaling (GO:0043123)	8/163	0.00307679	0.0499157	0	0	3.4911	20.1921	BST2;RNF31;SHISA5;TLR9;TRIM25;TLR7;LGALS9;TLR3
regulation of nuclease activity (GO:0032069)	2/6	0.00316925	0.0499157	0	0	33.3881	192.124	OAS2;OAS3
regulation of interleukin-10 secretion (GO:2001179)	2/6	0.00316925	0.0499157	0	0	33.3881	192.124	CD274;LGALS9
positive regulation of interferon-alpha secretion (GO:1902741)	2/6	0.00316925	0.0499157	0	0	33.3881	192.124	IFIH1;DDX58
antigen processing and presentation of endogenous peptide antigen (GO:0002483)	2/6	0.00316925	0.0499157	0	0	33.3881	192.124	TAP1;B2M
pyrimidine deoxyribonucleotide biosynthetic process (GO:0009221)	2/6	0.00316925	0.0499157	0	0	33.3881	192.124	DUT;CMPK2
regulation of interferon-alpha secretion (GO:1902739)	2/6	0.00316925	0.0499157	0	0	33.3881	192.124	IFIH1;DDX58

## Sheet: DOWN_IFN-IfnarWTvsNaCl-IfnarWT 
Downregulated GO pathways for the comparison IFNα-Ifnar1fl/fl LSEC vs NaCl-Ifnar1fl/fl LSEC with FDR<0.05 (Biological Processes collection 2018)
Term	Overlap	P.value	Adjusted.P.value	Old.P.value	Old.Adjusted.P.value	Odds.Ratio	Combined.Score	Genes
extracellular matrix organization (GO:0030198)	7/229	5.04534e-05	0.0377056	0	0	8.0647	79.7959	ADAMTS4;MMP14;TGFB1;VCAM1;SH3PXD2A;CYP1B1;ICAM1
positive regulation of vascular endothelial growth factor production (GO:0010575)	3/24	0.000135718	0.0377056	0	0	35.0882	312.458	TGFB1;CYP1B1;HIF1A
leukocyte cell-cell adhesion (GO:0007159)	3/27	0.000194359	0.0377056	0	0	30.6975	262.335	VCAM1;SELE;ICAM1
regulation of vascular endothelial growth factor production (GO:0010574)	3/27	0.000194359	0.0377056	0	0	30.6975	262.335	TGFB1;CYP1B1;HIF1A

## Sheet: UP_NaCl-IfnarKOvsNaCl-IfnarWT 
Upregulated GO pathways for the comparison Nacl-VeCadIfnar1_KO LSEC vs NaCl-Ifnar1fl/fl LSEC with FDR<0.05 (Biological Processes collection 2018)
Term	Overlap	P.value	Adjusted.P.value	Old.P.value	Old.Adjusted.P.value	Odds.Ratio	Combined.Score	Genes
negative regulation of transcription from RNA polymerase II promoter (GO:0000122)	27/565	7.18262e-12	1.09822e-08	0	0	5.82549	149.478	FOXC1;CITED2;HMGB1;TNF;DNAJB1;ZFP36;UBB;SOX18;BAG3;UBC;HES1;JUNB;HEXIM1;KLF10;PLK3;KLF11;JUN;JUND;KLF4;ESR1;SMAD7;BHLHE40;SNAI1;FOSB;ATF3;PPARD;HSPA1A
regulation of transcription from RNA polymerase II promoter (GO:0006357)	41/1478	5.93144e-10	3.62624e-07	0	0	3.4482	73.2591	CSRNP1;FOXC1;CITED2;GATA4;HMGB1;TNF;TOB1;TCEAL8;ZFP36;UBB;SOX18;UBC;HOXA1;HES1;JUNB;IER5;HOXA5;IER2;HEXIM1;KLF10;EGR1;PLK3;KLF11;JUN;JUND;FOS;SMAD6;KLF4;ESR1;FLI1;ETV5;SMAD7;KLF6;NR5A2;IRF1;BHLHE40;SNAI1;FOSB;SQSTM1;ATF3;PPARD
positive regulation of transcription from RNA polymerase II promoter (GO:0045944)	30/848	7.11493e-10	3.62624e-07	0	0	4.2725	89.9945	CSRNP1;FOXC1;CITED2;GATA4;HMGB1;TNF;UBB;SOX18;UBC;HOXA1;HES1;JUNB;IER5;HOXA5;IER2;KLF10;EGR1;JUN;JUND;FOS;KLF4;ESR1;ETV5;SMAD7;KLF6;NR5A2;IRF1;SQSTM1;ATF3;PPARD
negative regulation of transcription, DNA-templated (GO:0045892)	29/813	1.17371e-09	4.48651e-07	0	0	4.29059	88.2278	FOXC1;CITED2;HMGB1;TNF;ZFP36;UBB;SOX18;UBC;CAPN3;HES1;JUNB;HEXIM1;KLF10;PLK3;KLF11;JUN;JUND;KLF4;ESR1;SMAD7;ID2;IRF1;ID1;BHLHE40;SNAI1;ID3;FOSB;ATF3;PPARD
positive regulation of transcription, DNA-templated (GO:0045893)	34/1120	2.40032e-09	7.34017e-07	0	0	3.68622	73.1628	CSRNP1;FOXC1;CITED2;GATA4;HMGB1;TNF;UBB;SOX18;UBC;CAPN3;HOXA1;HES1;JUNB;IER5;HOXA5;IER2;KLF10;EGR1;JUN;JUND;FOS;KLF4;ESR1;FLI1;ETV5;SMAD7;KLF6;NR5A2;ID2;IRF1;SNAI1;SQSTM1;ATF3;PPARD
negative regulation of transcription from RNA polymerase II promoter in response to stress (GO:0097201)	5/10	1.92502e-08	4.46266e-06	0	0	105.33	1871.26	DNAJB1;JUN;BAG3;CITED2;HSPA1A
regulation of apoptotic process (GO:0042981)	27/815	2.20114e-08	4.46266e-06	0	0	3.9257	69.2168	CITED2;HMGB1;TNF;BBC3;UBB;BAG3;UBC;CAPN3;PIM3;HOXA5;PLK3;KLF11;JUN;GADD45B;GADD45A;DUSP1;MGMT;PLK2;SMAD6;GADD45G;RHOB;PINK1;SPRY2;SQSTM1;HSPA1B;HSPA1A;BCL2L1
regulation of cell cycle (GO:0051726)	14/215	2.33494e-08	4.46266e-06	0	0	7.62901	134.062	JUN;JUND;GADD45B;GADD45A;CITED2;GADD45G;RHOB;ID2;IRF1;ID1;ID3;PIM3;FBXO5;JUNB
negative regulation of cell proliferation (GO:0008285)	17/363	9.28229e-08	1.57696e-05	0	0	5.43282	87.9713	CDKN2D;KLF10;KLF11;BTG2;CDKN2C;CXCL1;SMAD6;KLF4;TOB1;ID2;IRF1;BHLHE40;HMOX1;HES1;TRIB1;HSPA1B;HSPA1A
negative regulation of gene expression (GO:0010629)	22/618	1.45915e-07	2.06005e-05	0	0	4.14696	65.2742	HEXIM1;KLF10;JUN;BTG2;CITED2;KLF4;TNF;ESR1;TOB1;ZFP36;PINK1;SOX18;ID2;IRF1;ID1;BHLHE40;ID3;CAPN3;HES1;HSPA1B;PPARD;HSPA1A
regulation of protein modification by small protein conjugation or removal (GO:1903320)	5/14	1.48205e-07	2.06005e-05	0	0	58.5047	919.967	EGR1;HSP90AA1;PINK1;HSPA1B;HSPA1A
negative regulation of apoptotic process (GO:0043066)	19/485	2.57219e-07	3.2774e-05	0	0	4.53208	68.7667	CDKN2D;PLK3;PRKCH;CITED2;MGMT;PLK2;SMAD6;KLF4;PINK1;UBB;BAG3;UBC;CAPN3;SPRY2;PIM3;SQSTM1;HSPA1B;HSPA1A;BCL2L1
activation of MAPKKK activity (GO:0000185)	4/7	2.87601e-07	3.38263e-05	0	0	139.711	2104.28	GADD45B;GADD45A;TNF;GADD45G
regulation of DNA binding (GO:0051101)	7/52	6.47574e-07	7.07243e-05	0	0	16.5274	235.515	FOXC1;JUN;ID2;ID1;ID3;HES1;HMGB1
positive regulation of programmed cell death (GO:0043068)	13/257	1.35561e-06	0.000132742	0	0	5.79051	78.237	KLF11;JUN;GADD45B;GADD45A;HMGB1;TNF;GADD45G;BBC3;RHOB;UBB;UBC;SQSTM1;HOXA5
regulation of transcription, DNA-templated (GO:0006355)	36/1598	1.38906e-06	0.000132742	0	0	2.67834	36.1225	FOXC1;CITED2;HMGB3;GATA4;HMGB1;TNF;TCEAL8;SOX18;CAPN3;HES1;FBXO5;JUNB;HEXIM1;KLF10;EGR1;KLF11;JUN;JUND;ZFP1;FOS;KLF4;ESR1;FLI1;ETV5;KLF6;NR5A2;MAFB;ID2;IRF1;ID1;BHLHE40;SNAI1;ID3;FOSB;ATF3;PPARD
positive regulation of gene expression (GO:0010628)	23/771	1.6275e-06	0.000146379	0	0	3.44729	45.947	EGR1;JUN;FOXC1;CITED2;CIRBP;GATA4;FOS;KLF4;TNF;ESR1;FLI1;RBM3;KLF6;NR5A2;SOX18;ID2;IRF1;SNAI1;CAPN3;SPRY2;HSPA1B;PPARD;HSPA1A
positive regulation of nucleic acid-templated transcription (GO:1903508)	18/502	1.91411e-06	0.000162593	0	0	4.10642	54.0662	EGR1;JUN;FOXC1;CITED2;GATA4;FOS;KLF4;TNF;ESR1;FLI1;KLF6;NR5A2;SOX18;ID2;IRF1;SNAI1;CAPN3;PPARD
regulation of cell death (GO:0010941)	8/96	4.17555e-06	0.000336022	0	0	9.68993	120.022	JUN;JUND;UBB;RILPL1;JUNB;HSPA1B;IER3;HSPA1A
response to lipid (GO:0033993)	9/140	8.88757e-06	0.000679455	0	0	7.34666	85.448	CDKN2D;JUN;JUND;CXCL1;TRIB1;JUNB;ESR1;SELE;PPARD
positive regulation of apoptotic process (GO:0043065)	13/307	9.45786e-06	0.000688622	0	0	4.79344	55.4537	KLF11;JUN;GADD45B;GADD45A;HMGB1;TNF;GADD45G;BBC3;RHOB;UBB;UBC;SQSTM1;HOXA5
negative regulation of cellular macromolecule biosynthetic process (GO:2000113)	17/512	1.02672e-05	0.000689045	0	0	3.76841	43.2861	HEXIM1;KLF10;JUN;BTG2;CITED2;KLF4;TNF;TOB1;SOX18;ID2;IRF1;ID1;BHLHE40;ID3;CAPN3;HES1;PPARD
negative regulation of programmed cell death (GO:0043069)	15/408	1.05765e-05	0.000689045	0	0	4.16288	47.6936	PLK3;CITED2;MGMT;PLK2;SMAD6;UBB;BAG3;UBC;CAPN3;SPRY2;PIM3;SQSTM1;HSPA1B;HSPA1A;BCL2L1
transmembrane receptor protein serine/threonine kinase signaling pathway (GO:0007178)	9/144	1.11626e-05	0.000689045	0	0	7.12754	81.2749	KLF10;JUN;UBB;UBC;ID1;FOS;SMAD6;TOB1;SMAD7
regulation of transforming growth factor beta receptor signaling pathway (GO:0017015)	7/79	1.12663e-05	0.000689045	0	0	10.3155	117.532	UBB;CITED2;UBC;NREP;SMAD6;SMAD7;HSPA1A
regulation of erythrocyte differentiation (GO:0045646)	5/32	1.29462e-05	0.000761334	0	0	19.4838	219.285	ZFP36;MAFB;HOXA5;HSPA1B;HSPA1A
positive regulation of cell cycle arrest (GO:0071158)	7/82	1.44204e-05	0.000816623	0	0	9.90136	110.369	PLK3;BTG2;UBB;GADD45A;PLK2;ID2;UBC
apoptotic process (GO:0006915)	11/231	1.58243e-05	0.000864119	0	0	5.38104	59.4819	PPP1R15A;PLK3;CSRNP1;GADD45A;IRF1;CAPN3;IER3;BBC3;RHOB;PPARD;BCL2L1
negative regulation of erythrocyte differentiation (GO:0045647)	3/6	1.73204e-05	0.000913204	0	0	104.232	1142.76	ZFP36;MAFB;HOXA5
negative regulation of nucleic acid-templated transcription (GO:1903507)	15/444	2.83831e-05	0.00143799	0	0	3.80647	39.8527	HEXIM1;KLF10;JUN;CITED2;KLF4;TNF;SOX18;ID2;IRF1;ID1;BHLHE40;ID3;CAPN3;HES1;PPARD
DNA damage response, signal transduction by p53 class mediator resulting in cell cycle arrest (GO:0006977)	6/62	2.93109e-05	0.00143799	0	0	11.3165	118.116	PLK3;BTG2;UBB;GADD45A;PLK2;UBC
regulation of chemokine biosynthetic process (GO:0045073)	3/7	3.00952e-05	0.00143799	0	0	78.1697	813.836	EGR1;HMOX1;TNF
signal transduction involved in mitotic G1 DNA damage checkpoint (GO:0072431)	6/63	3.21385e-05	0.00146577	0	0	11.1174	115.014	PLK3;BTG2;UBB;GADD45A;PLK2;UBC
regulation of transcription from RNA polymerase II promoter in response to stress (GO:0043618)	7/93	3.28672e-05	0.00146577	0	0	8.6301	89.0888	DNAJB1;UBB;BAG3;UBC;HMOX1;ATF3;HSPA1A
regulation of cell proliferation (GO:0042127)	20/740	3.35526e-05	0.00146577	0	0	3.06471	31.5738	CDKN2D;KLF10;KLF11;JUN;BTG2;JUND;CDKN2C;CXCL1;SMAD6;KLF4;TOB1;SERTAD1;IRF1;BHLHE40;HES1;JUNB;IER5;HSPA1B;HBEGF;HSPA1A
cellular response to cytokine stimulus (GO:0071345)	15/456	3.85262e-05	0.00163629	0	0	3.7006	37.6136	EGR1;FOXC1;HSP90AA1;CISH;CXCL1;FOS;TNF;SOCS3;ZFP36;UBB;IRF1;UBC;HMOX1;JUNB;BCL2L1
cellular response to transforming growth factor beta stimulus (GO:0071560)	7/100	5.24732e-05	0.00216842	0	0	7.97769	78.6218	KLF10;JUN;UBB;UBC;ID1;FOS;SMAD7
positive regulation of proteasomal ubiquitin-dependent protein catabolic process (GO:0032436)	6/70	5.86476e-05	0.00235979	0	0	9.89789	96.4447	PLK3;SUMO2;TRIB1;HSPA1B;SMAD7;HSPA1A
negative regulation of signal transduction in absence of ligand (GO:1901099)	4/23	6.4469e-05	0.00244457	0	0	22.0418	212.688	TNF;HSPA1B;BCL2L1;HSPA1A
negative regulation of extrinsic apoptotic signaling pathway in absence of ligand (GO:2001240)	4/23	6.4469e-05	0.00244457	0	0	22.0418	212.688	TNF;HSPA1B;BCL2L1;HSPA1A
negative regulation of sequence-specific DNA binding transcription factor activity (GO:0043433)	8/140	6.55508e-05	0.00244457	0	0	6.44554	62.0878	ID2;ID1;BHLHE40;ID3;TRIB1;KLF4;ESR1;SMAD7
regulation of cellular response to stress (GO:0080135)	7/104	6.74166e-05	0.00245428	0	0	7.64716	73.448	DNAJB1;HSP90AA1;PINK1;BAG3;HSPA1B;IER3;HSPA1A
cellular lipid catabolic process (GO:0044242)	4/24	7.6781e-05	0.00273019	0	0	20.9386	198.384	PNLIPRP2;PCCB;CEL;PPARD
cellular response to heat (GO:0034605)	5/47	8.77077e-05	0.00304784	0	0	12.5158	116.917	BAG3;HMOX1;IER5;HSPA1B;HSPA1A
transforming growth factor beta receptor signaling pathway (GO:0007179)	6/76	9.32177e-05	0.00316733	0	0	9.04675	83.9591	KLF10;JUN;UBB;UBC;ID1;FOS
response to laminar fluid shear stress (GO:0034616)	3/10	0.000100999	0.0032857	0	0	44.6617	410.905	KLF4;SMAD6;SMAD7
negative regulation of inclusion body assembly (GO:0090084)	3/10	0.000100999	0.0032857	0	0	44.6617	410.905	DNAJB1;HSPA1B;HSPA1A
regulation of cellular response to heat (GO:1900034)	6/78	0.000107788	0.00343348	0	0	8.79456	80.3414	DNAJB1;HSP90AA1;BAG3;IER5;HSPA1B;HSPA1A
positive regulation of cell differentiation (GO:0045597)	9/194	0.000115483	0.00360353	0	0	5.18796	47.036	JUN;FOXC1;ZFP36;PRKCH;JUND;SNAI1;JUNB;HOXA5;PPARD
regulation of extrinsic apoptotic signaling pathway in absence of ligand (GO:2001239)	4/27	0.000123975	0.00379114	0	0	18.2047	163.76	TNF;HSPA1B;BCL2L1;HSPA1A
cellular response to oxidative stress (GO:0034599)	7/115	0.000127203	0.0038136	0	0	6.86445	61.5722	JUN;PINK1;HMOX1;FOS;ETV5;HSPA1B;HSPA1A
regulation of inclusion body assembly (GO:0090083)	3/11	0.000137888	0.00385068	0	0	39.077	347.358	DNAJB1;HSPA1B;HSPA1A
positive regulation of nuclear-transcribed mRNA poly(A) tail shortening (GO:0060213)	3/11	0.000137888	0.00385068	0	0	39.077	347.358	BTG2;ZFP36;TOB1
regulation of nuclear-transcribed mRNA poly(A) tail shortening (GO:0060211)	3/11	0.000137888	0.00385068	0	0	39.077	347.358	BTG2;ZFP36;TOB1
DNA damage response, signal transduction by p53 class mediator (GO:0030330)	6/82	0.000142336	0.00385068	0	0	8.33	73.7815	PLK3;BTG2;UBB;GADD45A;PLK2;UBC
negative regulation of homeostatic process (GO:0032845)	4/28	0.000143551	0.00385068	0	0	17.4453	154.371	ZFP36;MAFB;PIM3;HOXA5
ventricular septum development (GO:0003281)	4/28	0.000143551	0.00385068	0	0	17.4453	154.371	CITED2;GATA4;HES1;SMAD7
negative regulation of cellular response to transforming growth factor beta stimulus (GO:1903845)	5/53	0.000156583	0.00412785	0	0	10.948	95.9258	UBB;UBC;SMAD6;SMAD7;HSPA1A
regulation of I-kappaB kinase/NF-kappaB signaling (GO:0043122)	9/204	0.00016876	0.00436329	0	0	4.9194	42.735	PINK1;UBB;PLK2;UBC;HMOX1;CAPN3;TNF;SQSTM1;ESR1
negative regulation of cellular component organization (GO:0051129)	5/54	0.000171221	0.00436329	0	0	10.7241	93.0049	DNAJB1;SPRY2;TNF;HSPA1B;HSPA1A
negative regulation of transforming growth factor beta receptor signaling pathway (GO:0030512)	5/55	0.000186882	0.00460875	0	0	10.509	90.2205	UBB;UBC;SMAD6;SMAD7;HSPA1A
Notch signaling pathway (GO:0007219)	5/55	0.000186882	0.00460875	0	0	10.509	90.2205	UBB;UBC;SNAI1;NRARP;HES1
regulation of tumor necrosis factor-mediated signaling pathway (GO:0010803)	5/56	0.000203611	0.00494162	0	0	10.3025	87.5637	UBB;UBC;TNF;HSPA1B;HSPA1A
negative regulation of cellular process (GO:0048523)	15/534	0.00022118	0.00528414	0	0	3.13178	26.3587	CDKN2D;KLF10;KLF11;BTG2;CDKN2C;OSGIN1;CXCL1;SMAD6;KLF4;TOB1;RHOB;IRF1;BHLHE40;HSPA1B;HSPA1A
positive regulation of NF-kappaB transcription factor activity (GO:0051092)	7/128	0.000247066	0.00581175	0	0	6.1229	50.8559	PRKCH;UBB;UBC;CAPN3;TNF;HSPA1B;HSPA1A
negative regulation of DNA binding (GO:0043392)	4/34	0.000310776	0.00719965	0	0	13.952	112.683	JUN;ID2;ID1;ID3
negative regulation of intrinsic apoptotic signaling pathway (GO:2001243)	5/62	0.000329192	0.00751245	0	0	9.21519	73.8954	CDKN2D;PINK1;SNAI1;HSPA1A;BCL2L1
negative regulation of protein phosphorylation (GO:0001933)	8/178	0.00034296	0.00771156	0	0	4.9951	39.8504	SPRED2;CISH;DUSP1;SPRY2;TRIB1;SMAD6;CORO1C;SMAD7
regulation of cyclin-dependent protein kinase activity (GO:1904029)	4/35	0.000348246	0.00771693	0	0	13.5013	107.505	CDKN2D;CDKN2C;SERTAD1;GADD45A
negative regulation of peptidyl-threonine phosphorylation (GO:0010801)	3/15	0.00036956	0.00795856	0	0	26.0461	205.847	SPRED2;SPRY2;SMAD7
endoderm development (GO:0007492)	3/15	0.00036956	0.00795856	0	0	26.0461	205.847	DUSP5;DUSP1;GATA4
response to molecule of bacterial origin (GO:0002237)	6/98	0.000376731	0.00800031	0	0	6.87573	54.2081	JUN;JUND;CXCL1;TRIB1;JUNB;SELE
positive regulation of smooth muscle cell proliferation (GO:0048661)	4/37	0.000432707	0.00874085	0	0	12.6817	98.2258	JUN;ID2;HMOX1;TNF
regulation of protein ubiquitination (GO:0031396)	6/101	0.000442897	0.00874085	0	0	6.65759	51.411	HSP90AA1;PINK1;UBB;HSPA1B;SMAD7;HSPA1A
positive regulation of nuclear-transcribed mRNA catabolic process, deadenylation-dependent decay (GO:1900153)	3/16	0.00045162	0.00874085	0	0	24.0413	185.182	BTG2;ZFP36;TOB1
artery development (GO:0060840)	3/16	0.00045162	0.00874085	0	0	24.0413	185.182	HOXA1;HES1;SMAD7
regulation of bicellular tight junction assembly (GO:2000810)	3/16	0.00045162	0.00874085	0	0	24.0413	185.182	PRKCH;SNAI1;TNF
embryonic heart tube development (GO:0035050)	3/16	0.00045162	0.00874085	0	0	24.0413	185.182	CITED2;SOX18;HES1
regulation of intrinsic apoptotic signaling pathway in response to DNA damage (GO:1902229)	3/16	0.00045162	0.00874085	0	0	24.0413	185.182	CDKN2D;SNAI1;BCL2L1
regulation of cyclin-dependent protein serine/threonine kinase activity (GO:0000079)	5/67	0.000472569	0.00903198	0	0	8.46989	64.8567	HEXIM1;CDKN2D;CDKN2C;SERTAD1;GADD45A
ERBB2 signaling pathway (GO:0038128)	4/39	0.000530843	0.00991731	0	0	11.9559	90.1597	HSP90AA1;UBB;UBC;HBEGF
response to purine-containing compound (GO:0014074)	3/17	0.000544511	0.00991731	0	0	22.3229	167.771	JUN;JUND;JUNB
positive regulation of signal transduction by p53 class mediator (GO:1901798)	3/17	0.000544511	0.00991731	0	0	22.3229	167.771	HEXIM1;SPRED2;UBB
G1/S transition of mitotic cell cycle (GO:0000082)	6/105	0.000544836	0.00991731	0	0	6.3873	48.0007	CDKN2D;PLK3;KLF11;CDKN2C;PLK2;FBXO5
positive regulation of p38MAPK cascade (GO:1900745)	3/18	0.000648787	0.0115348	0	0	20.8337	152.928	GADD45B;GADD45A;GADD45G
response to organophosphorus (GO:0046683)	3/18	0.000648787	0.0115348	0	0	20.8337	152.928	JUN;JUND;JUNB
negative regulation of cell cycle (GO:0045786)	5/72	0.000658559	0.011574	0	0	7.83582	57.401	HEXIM1;BTG2;FOXC1;DUSP1;RHOB
positive regulation of proteasomal protein catabolic process (GO:1901800)	5/73	0.000701517	0.0121889	0	0	7.7202	56.0661	SUMO2;TRIB1;HSPA1B;SMAD7;HSPA1A
negative regulation of ERBB signaling pathway (GO:1901185)	4/43	0.00077291	0.0131309	0	0	10.7274	76.8659	UBB;UBC;SPRY2;HBEGF
response to unfolded protein (GO:0006986)	4/43	0.00077291	0.0131309	0	0	10.7274	76.8659	DNAJB1;HSP90AA1;HSPA1B;HSPA1A
response to lipopolysaccharide (GO:0032496)	7/155	0.000781513	0.0131311	0	0	4.99902	35.7644	ZFP36;JUN;JUND;CXCL1;TRIB1;JUNB;SELE
positive regulation of developmental process (GO:0051094)	6/113	0.00080276	0.0133415	0	0	5.90734	42.1043	JUN;PINK1;JUND;TNF;JUNB;CORO1C
negative regulation of extrinsic apoptotic signaling pathway (GO:2001237)	5/76	0.000843006	0.0135815	0	0	7.39287	52.3307	HMOX1;TNF;HSPA1B;HSPA1A;BCL2L1
positive regulation of JNK cascade (GO:0046330)	5/76	0.000843006	0.0135815	0	0	7.39287	52.3307	GADD45B;GADD45A;HMGB1;TNF;GADD45G
regulation of smooth muscle cell proliferation (GO:0048660)	4/44	0.000843845	0.0135815	0	0	10.4587	74.0221	ID2;HMOX1;TRIB1;TNF
negative regulation of transmembrane receptor protein serine/threonine kinase signaling pathway (GO:0090101)	5/77	0.000894584	0.0142481	0	0	7.28982	51.1684	UBB;UBC;SMAD6;SMAD7;HSPA1A
negative regulation of protein modification by small protein conjugation or removal (GO:1903321)	4/46	0.000999274	0.0157514	0	0	9.95969	68.8063	CAPN3;HSPA1B;SMAD7;HSPA1A
ventricular septum morphogenesis (GO:0060412)	3/21	0.00103517	0.0161508	0	0	17.3588	119.31	CITED2;HES1;SMAD7
regulation of protein serine/threonine kinase activity (GO:0071900)	5/80	0.00106345	0.0164244	0	0	6.99716	47.9042	CDKN2D;CDKN2C;SERTAD1;GADD45A;TRIB1
negative regulation of cell migration (GO:0030336)	6/121	0.00114614	0.0175245	0	0	5.49416	37.2029	CITED2;HMOX1;TRIB1;CORO1C;SMAD7;RHOB
negative regulation of mitotic cell cycle (GO:0045930)	4/48	0.00117379	0.0176674	0	0	9.50601	64.142	BTG2;FOXC1;DUSP1;GADD45A
positive regulation of sequence-specific DNA binding transcription factor activity (GO:0051091)	8/215	0.00118202	0.0176674	0	0	4.09453	27.5993	PRKCH;UBB;UBC;CAPN3;TNF;ESR1;HSPA1B;HSPA1A
negative regulation of myeloid cell differentiation (GO:0045638)	3/22	0.00119015	0.0176674	0	0	16.4443	110.731	ZFP36;MAFB;HOXA5
cytokine-mediated signaling pathway (GO:0019221)	15/633	0.00127495	0.0187442	0	0	2.61659	17.4392	EGR1;FOXC1;HSP90AA1;CISH;CXCL1;FOS;TNF;SOCS3;UBB;IRF1;UBC;HMOX1;JUNB;SQSTM1;BCL2L1
negative regulation of macromolecule metabolic process (GO:0010605)	6/124	0.00130042	0.0189367	0	0	5.35367	35.5755	PINK1;CITED2;ID2;KLF4;TNF;ESR1
regulation of neuron differentiation (GO:0045664)	5/84	0.00132401	0.0190982	0	0	6.64153	44.014	MMD;ID2;ID1;ID3;NREP
negative regulation of meiotic cell cycle (GO:0051447)	2/6	0.00135462	0.019178	0	0	51.8403	342.365	DUSP1;FBXO5
regulation of microtubule nucleation (GO:0010968)	2/6	0.00135462	0.019178	0	0	51.8403	342.365	HSPA1B;HSPA1A
mitotic cell cycle phase transition (GO:0044772)	8/221	0.00140817	0.0197532	0	0	3.97797	26.1172	CDKN2D;PLK3;HSP90AA1;CDKN2C;UBB;PLK2;UBC;PHLDA1
positive regulation of macromolecule metabolic process (GO:0010604)	9/276	0.00148758	0.0206774	0	0	3.57963	23.3055	EGR1;CITED2;ID2;SPRY2;KLF4;TNF;SELE;HSPA1B;HSPA1A
chaperone mediated protein folding requiring cofactor (GO:0051085)	3/24	0.00154218	0.0208672	0	0	14.8767	96.32	DNAJB1;HSPA1B;HSPA1A
negative regulation of cyclin-dependent protein serine/threonine kinase activity (GO:0045736)	3/24	0.00154218	0.0208672	0	0	14.8767	96.32	CDKN2D;HEXIM1;CDKN2C
negative regulation of intrinsic apoptotic signaling pathway in response to DNA damage (GO:1902230)	3/24	0.00154218	0.0208672	0	0	14.8767	96.32	CDKN2D;SNAI1;BCL2L1
regulation of proteasomal ubiquitin-dependent protein catabolic process (GO:0032434)	5/88	0.00162892	0.0218475	0	0	6.32017	40.5745	SUMO2;TRIB1;HSPA1B;SMAD7;HSPA1A
positive regulation of MAP kinase activity (GO:0043406)	7/177	0.00168709	0.0222376	0	0	4.34722	27.7559	DUSP5;UBB;GADD45B;GADD45A;UBC;TNF;GADD45G
regulation of angiogenesis (GO:0045765)	7/177	0.00168709	0.0222376	0	0	4.34722	27.7559	FOXC1;HMOX1;SPRY2;GATA4;KLF4;HOXA5;RHOB
positive regulation of nitric oxide biosynthetic process (GO:0045429)	3/25	0.00174011	0.0223582	0	0	14.1998	90.2226	HSP90AA1;KLF4;TNF
monocarboxylic acid catabolic process (GO:0072329)	3/25	0.00174011	0.0223582	0	0	14.1998	90.2226	PCCB;CEL;PPARD
positive regulation of nitric oxide metabolic process (GO:1904407)	3/25	0.00174011	0.0223582	0	0	14.1998	90.2226	HSP90AA1;KLF4;TNF
regulation of JNK cascade (GO:0046328)	5/90	0.00179935	0.0229266	0	0	6.17084	39.0017	PINK1;GADD45B;GADD45A;HMGB1;GADD45G
regulation of vitamin D biosynthetic process (GO:0060556)	2/7	0.00188444	0.0229266	0	0	41.4702	260.189	SNAI1;TNF
positive regulation of hemopoiesis (GO:1903708)	2/7	0.00188444	0.0229266	0	0	41.4702	260.189	FOXC1;HOXA5
positive regulation of tumor necrosis factor-mediated signaling pathway (GO:1903265)	2/7	0.00188444	0.0229266	0	0	41.4702	260.189	HSPA1B;HSPA1A
store-operated calcium entry (GO:0002115)	2/7	0.00188444	0.0229266	0	0	41.4702	260.189	CRACR2A;CRACR2B
negative regulation of cyclin-dependent protein serine/threonine kinase activity involved in G1/S transition of mitotic cell cycle (GO:0031658)	2/7	0.00188444	0.0229266	0	0	41.4702	260.189	CDKN2D;CDKN2C
positive regulation of cellular protein metabolic process (GO:0032270)	5/91	0.0018893	0.0229266	0	0	6.09878	38.2488	RBM3;HSP90AA1;CIRBP;CAPN3;KLF4
regulation of transcription involved in G1/S transition of mitotic cell cycle (GO:0000083)	3/26	0.0019532	0.0230898	0	0	13.5817	84.7265	KLF11;ID2;FBXO5
regulation of pri-miRNA transcription from RNA polymerase II promoter (GO:1902893)	3/26	0.0019532	0.0230898	0	0	13.5817	84.7265	JUN;FOS;PPARD
regulation of p38MAPK cascade (GO:1900744)	3/26	0.0019532	0.0230898	0	0	13.5817	84.7265	GADD45B;GADD45A;GADD45G
activation of protein kinase activity (GO:0032147)	8/233	0.00196317	0.0230898	0	0	3.76351	23.4587	DUSP5;PINK1;GADD45B;UBB;GADD45A;UBC;TNF;GADD45G
regulation of cysteine-type endopeptidase activity involved in apoptotic process (GO:0043281)	5/93	0.00207902	0.0242658	0	0	5.95956	36.8054	CDKN2D;HMGB1;KLF4;TNF;BBC3
negative regulation of response to DNA damage stimulus (GO:2001021)	3/28	0.00242645	0.0281064	0	0	12.4939	75.2298	CDKN2D;SNAI1;BCL2L1
positive regulation of intracellular signal transduction (GO:1902533)	12/479	0.00246117	0.0282942	0	0	2.74563	16.4933	HEXIM1;PINK1;UBB;PLK2;UBC;HMOX1;SPRY2;HMGB1;TNF;ESR1;HBEGF;BCL2L1
nuclear-transcribed mRNA catabolic process, deadenylation-independent decay (GO:0031086)	2/8	0.00249665	0.0284879	0	0	34.5567	207.092	ZFP36;PNRC1
regulation of gene expression (GO:0010468)	20/1037	0.00252945	0.0286483	0	0	2.13594	12.7724	EGR1;FOXC1;ZFP1;CITED2;HMGB3;GATA4;HMGB1;TOB2;KLF4;TNF;ESR1;TOB1;PINK1;NR5A2;MAFB;ID2;BHLHE40;SPRY2;HSPA1B;HSPA1A
regulation of keratinocyte differentiation (GO:0045616)	3/29	0.00268736	0.0295799	0	0	12.0128	71.1058	FOXC1;ZFP36;PRKCH
positive regulation of myeloid cell differentiation (GO:0045639)	3/29	0.00268736	0.0295799	0	0	12.0128	71.1058	HOXA5;HSPA1B;HSPA1A
negative regulation of Notch signaling pathway (GO:0045746)	3/29	0.00268736	0.0295799	0	0	12.0128	71.1058	UBB;UBC;NRARP
response to reactive oxygen species (GO:0000302)	4/60	0.00268908	0.0295799	0	0	7.46447	44.1789	PLK3;JUN;HMOX1;FOS
positive regulation of cellular amide metabolic process (GO:0034250)	4/61	0.00285638	0.0311958	0	0	7.33315	42.959	RBM3;PLK3;CIRBP;TNF
artery morphogenesis (GO:0048844)	3/30	0.00296493	0.0317019	0	0	11.5673	67.3319	HOXA1;HES1;SMAD7
'de novo' posttranslational protein folding (GO:0051084)	3/30	0.00296493	0.0317019	0	0	11.5673	67.3319	DNAJB1;HSPA1B;HSPA1A
positive regulation of reactive oxygen species biosynthetic process (GO:1903428)	3/30	0.00296493	0.0317019	0	0	11.5673	67.3319	HSP90AA1;KLF4;TNF
stress-activated MAPK cascade (GO:0051403)	4/62	0.00303067	0.0321799	0	0	7.20635	41.7894	ZFP36;UBB;UBC;TRIB1
negative regulation of neuron differentiation (GO:0045665)	4/64	0.00340077	0.0356149	0	0	6.96543	39.5898	ID2;ID1;ID3;HES1
positive regulation of cell adhesion (GO:0045785)	4/64	0.00340077	0.0356149	0	0	6.96543	39.5898	CITED2;TNF;PRSS2;SMAD7
regulation of cell growth (GO:0001558)	7/201	0.00343924	0.0357728	0	0	3.80476	21.5825	CDKN2D;CDKN2C;CISH;OSGIN1;PRSS2;HSPA1B;HSPA1A
regulation of nitric oxide biosynthetic process (GO:0045428)	3/32	0.00357137	0.0366429	0	0	10.7684	60.678	HSP90AA1;KLF4;TNF
global genome nucleotide-excision repair (GO:0070911)	3/32	0.00357137	0.0366429	0	0	10.7684	60.678	UBB;UBC;SUMO2
negative regulation of blood vessel morphogenesis (GO:2000181)	4/65	0.00359685	0.0366429	0	0	6.8509	38.5548	FOXC1;SPRY2;KLF4;HOXA5
protein stabilization (GO:0050821)	6/152	0.00361875	0.0366429	0	0	4.32078	24.2898	HSP90AA1;PINK1;FKBPL;HSPA1B;SMAD7;HSPA1A
positive regulation of cell-cell adhesion (GO:0022409)	3/33	0.00390088	0.0387302	0	0	10.4089	57.7338	CITED2;TNF;SMAD7
negative regulation of neurogenesis (GO:0050768)	3/33	0.00390088	0.0387302	0	0	10.4089	57.7338	ID2;ID1;ID3
negative regulation of mitochondrion organization (GO:0010823)	3/33	0.00390088	0.0387302	0	0	10.4089	57.7338	PINK1;BCL2L1;HSPA1A
negative regulation of pathway-restricted SMAD protein phosphorylation (GO:0060394)	2/10	0.0039618	0.0390813	0	0	25.9149	143.337	SMAD6;SMAD7
regulation of interleukin-8 production (GO:0032677)	3/34	0.00424831	0.0411119	0	0	10.0727	55.0092	TNF;HSPA1B;HSPA1A
positive regulation of chemokine production (GO:0032722)	3/34	0.00424831	0.0411119	0	0	10.0727	55.0092	EGR1;HMOX1;TNF
positive regulation of DNA binding (GO:0043388)	3/34	0.00424831	0.0411119	0	0	10.0727	55.0092	FOXC1;HES1;HMGB1
macroautophagy (GO:0016236)	5/110	0.00429445	0.0412969	0	0	4.99037	27.1997	GABARAPL1;PINK1;UBB;UBC;SQSTM1
response to organic cyclic compound (GO:0014070)	4/69	0.00445792	0.0423364	0	0	6.428	34.7952	CDKN2D;HMOX1;TNF;ESR1
negative regulation of angiogenesis (GO:0016525)	4/69	0.00445792	0.0423364	0	0	6.428	34.7952	FOXC1;SPRY2;KLF4;HOXA5
positive regulation of cellular biosynthetic process (GO:0031328)	6/159	0.00450696	0.042538	0	0	4.12163	22.2656	RBM3;EGR1;HSP90AA1;CIRBP;KLF4;TNF
regulation of mitochondrial membrane potential (GO:0051881)	3/35	0.00461395	0.0432805	0	0	9.7574	52.4819	PINK1;UBB;BCL2L1
regulation of RNA polymerase II transcriptional preinitiation complex assembly (GO:0045898)	2/11	0.00481156	0.044859	0	0	23.0343	122.928	HMGB1;ESR1
mRNA catabolic process (GO:0006402)	3/36	0.00499805	0.0463153	0	0	9.46124	50.1324	ZFP36;HSPA1B;HSPA1A
positive regulation of I-kappaB kinase/NF-kappaB signaling (GO:0043123)	6/163	0.00508155	0.0468053	0	0	4.0158	21.212	PINK1;UBB;PLK2;UBC;HMOX1;TNF
negative regulation of cell growth (GO:0030308)	5/115	0.00518195	0.0472168	0	0	4.76233	25.0621	CDKN2D;CDKN2C;OSGIN1;HSPA1B;HSPA1A
regulation of neuron death (GO:1901214)	4/72	0.00518798	0.0472168	0	0	6.14348	32.3234	EGR1;UBB;RILPL1;FOS
regulation of peptidyl-threonine phosphorylation (GO:0010799)	3/37	0.00540088	0.0488635	0	0	9.18251	47.9437	SPRED2;SPRY2;SMAD7
nucleic acid phosphodiester bond hydrolysis (GO:0090305)	4/73	0.00544806	0.0490005	0	0	6.05414	31.5572	UBB;UBC;RNASE1;PNRC1

## Sheet: DOWN_NaClIfnarKOvsNaCl-IfnarWT 
Downregulated GO pathways for the comparison Nacl-VeCadIfnar1_KO LSEC vs NaCl-Ifnar1fl/fl LSEC with FDR<0.05 (Biological Processes collection 2018)
Term	Overlap	P.value	Adjusted.P.value	Old.P.value	Old.Adjusted.P.value	Odds.Ratio	Combined.Score	Genes
cellular response to type I interferon (GO:0071357)	21/65	7.91515e-21	7.15925e-18	0	0	26.5524	1228.99	IFITM3;RSAD2;STAT1;MX2;STAT2;MX1;ADAR;ISG15;IFI35;IFIT1;SAMHD1;IFIT3;PSMB8;IFIT2;ISG20;OAS2;IRF7;GBP2;XAF1;IRF9;IFNAR1
type I interferon signaling pathway (GO:0060337)	21/65	7.91515e-21	7.15925e-18	0	0	26.5524	1228.99	IFITM3;RSAD2;STAT1;MX2;STAT2;MX1;ADAR;ISG15;IFI35;IFIT1;SAMHD1;IFIT3;PSMB8;IFIT2;ISG20;OAS2;IRF7;GBP2;XAF1;IRF9;IFNAR1
cytokine-mediated signaling pathway (GO:0019221)	48/633	1.21964e-16	7.35442e-14	0	0	4.80745	176.158	IFITM3;CXCL9;CIITA;CSF3R;CSF1;ITGB2;F13A1;CSF2RB;ADAR;IFI35;IFIT1;PTGS2;SAMHD1;IFIT3;EDA2R;IFIT2;HSP90B1;TRIM5;GBP2;B2M;CCR2;IL33;VCAM1;RSAD2;SYK;IL1R1;STAT1;STAT2;MX2;PRKCD;MX1;FN1;ISG15;TNFRSF1B;MMP9;PSMB8;IL17RA;ISG20;CXCL10;OAS2;IL1B;CANX;SAA1;IRF7;PTPN6;XAF1;IRF9;IFNAR1
response to cytokine (GO:0034097)	18/138	1.04288e-10	4.71645e-08	0	0	8.24239	189.442	IFITM3;CD274;ITIH4;CIITA;IL1R1;STAT1;MX2;MX1;TRAFD1;EIF2AK2;ISG15;ADAR;NFKB2;TIMP3;PTPN6;LGALS9;XAF1;IKBKE
positive regulation of cytokine production (GO:0001819)	21/220	1.06417e-09	3.38433e-07	0	0	5.82441	120.338	ZBP1;GBP5;IL33;DDX58;EIF2AK2;CLEC9A;PTGS2;SULF1;DDX60;IL17RA;NFKB2;C3;CCDC88B;FGR;IL1B;DHX58;SAA1;IRF7;LGALS9;LRRFIP1;CCR2
negative regulation of viral life cycle (GO:1903901)	12/61	1.13669e-09	3.38433e-07	0	0	13.2815	273.534	IFITM3;ISG20;PARP10;RSAD2;SLPI;TRIM5;OAS2;MX1;EIF2AK2;ISG15;ZC3HAV1;IFIT1
platelet degranulation (GO:0002576)	16/124	1.35585e-09	3.38433e-07	0	0	8.10001	165.393	LGALS3BP;FGB;FGA;ITIH4;ORM1;PLEK;FGG;FN1;F13A1;PLG;THBS1;KNG1;MANF;APOH;SERPING1;TIMP3
negative regulation of viral genome replication (GO:0045071)	11/50	1.59638e-09	3.38433e-07	0	0	15.2619	309.139	IFITM3;ISG20;PARP10;RSAD2;SLPI;OAS2;MX1;EIF2AK2;ISG15;ZC3HAV1;IFIT1
regulation of viral genome replication (GO:0045069)	12/63	1.68375e-09	3.38433e-07	0	0	12.7593	257.767	IFITM3;ISG20;PARP10;RSAD2;SLPI;OAS2;MX1;EIF2AK2;ADAR;ISG15;ZC3HAV1;IFIT1
regulation of innate immune response (GO:0045088)	12/69	5.03029e-09	9.0998e-07	0	0	11.4127	218.072	FGR;GBP5;STAT1;STAT2;DHX58;ACOD1;TRAFD1;PTPN6;PARP9;SAMHD1;USP18;IFNAR1
regulation of type I interferon production (GO:0032479)	13/85	5.89614e-09	9.69647e-07	0	0	9.80768	185.845	ZBP1;UBA7;DDX58;NLRC5;ACOD1;UBE2L6;ISG15;NFKB2;IFIH1;DHX58;IRF7;LRRFIP1;IKBKE
regulated exocytosis (GO:0045055)	16/148	1.81644e-08	2.73829e-06	0	0	6.61913	117.978	LGALS3BP;FGB;FGA;ITIH4;ORM1;PLEK;FGG;FN1;F13A1;PLG;THBS1;KNG1;MANF;APOH;SERPING1;TIMP3
negative regulation of type I interferon production (GO:0032480)	9/44	9.87633e-08	1.37433e-05	0	0	13.8405	223.255	IFIH1;UBA7;DDX58;DHX58;NLRC5;ACOD1;UBE2L6;ISG15;IKBKE
negative regulation of cytokine production (GO:0001818)	13/110	1.39058e-07	1.79682e-05	0	0	7.27062	114.791	CD274;ORM1;UBA7;DDX58;NLRC5;ACOD1;UBE2L6;ISG15;THBS1;IFIH1;DHX58;LGALS9;IKBKE
cellular response to interferon-gamma (GO:0071346)	13/116	2.60935e-07	3.14688e-05	0	0	6.84498	103.763	GBP6;CIITA;VCAM1;STAT1;PRKCD;ACOD1;TRIM5;OAS2;IRF7;LGALS9;GBP2;B2M;IRF9
interferon-gamma-mediated signaling pathway (GO:0060333)	10/70	6.62054e-07	7.48535e-05	0	0	8.98393	127.823	CIITA;VCAM1;TRIM5;OAS2;STAT1;PRKCD;IRF7;GBP2;B2M;IRF9
positive regulation of cytokine secretion (GO:0050715)	10/73	9.86734e-07	0.000105	0	0	8.55481	118.303	IFIH1;FGR;CD274;IL33;ORM1;DDX58;SAA1;MBP;CLEC9A;LGALS9
cellular response to cytokine stimulus (GO:0071345)	25/456	1.71717e-06	0.000172576	0	0	3.19959	42.474	SELPLG;CSF3R;CSF1;ITGB2;F13A1;CSF2RB;IFIT1;PTGS2;HSP90B1;LGALS9;CCR2;GBP6;VCAM1;IL1R1;STAT1;STAT2;FN1;ACOD1;TNFRSF1B;MMP9;CXCL10;IL1B;SAA1;PTPN6;IFNAR1
negative regulation of blood coagulation (GO:0030195)	7/36	3.88514e-06	0.000369906	0	0	12.925	161.024	FGB;VTN;FGA;APOH;FGG;PLG;KNG1
regulation of type I interferon-mediated signaling pathway (GO:0060338)	7/39	6.82231e-06	0.000591023	0	0	11.7115	139.312	ZBP1;STAT1;STAT2;NLRC5;PTPN6;USP18;IFNAR1
positive regulation of response to external stimulus (GO:0032103)	10/90	6.86096e-06	0.000591023	0	0	6.73106	80.03	IL33;GPRC5B;APOH;DHX58;ACOD1;PLG;DDX60;S100A9;THBS1;CCR2
leukocyte tethering or rolling (GO:0050901)	5/16	8.10007e-06	0.000637088	0	0	24.2292	284.055	SELPLG;VCAM1;ITGA4;SELL;ITGB7
leukocyte adhesion to vascular endothelial cell (GO:0061756)	5/16	8.10007e-06	0.000637088	0	0	24.2292	284.055	SELPLG;VCAM1;ITGA4;SELL;ITGB7
response to interferon-alpha (GO:0035455)	5/17	1.12999e-05	0.000851732	0	0	22.209	252.977	IFITM3;MX2;EIF2AK2;ADAR;IFNAR1
positive regulation of type I interferon production (GO:0032481)	8/62	1.90675e-05	0.0013796	0	0	7.94439	86.3359	IFIH1;ZBP1;DDX58;STAT1;DHX58;IRF7;LRRFIP1;NFKB2
regulation of heterotypic cell-cell adhesion (GO:0034114)	5/19	2.0591e-05	0.0013796	0	0	19.0344	205.393	FGB;FGA;IL1B;FGG;MBP
response to interferon-beta (GO:0035456)	5/19	2.0591e-05	0.0013796	0	0	19.0344	205.393	IFITM3;STAT1;ACOD1;XAF1;IKBKE
negative regulation of innate immune response (GO:0045824)	5/20	2.70361e-05	0.00174673	0	0	17.7645	186.853	DHX58;NLRC5;ACOD1;TRAFD1;SERPING1
negative regulation of protein binding (GO:0032091)	8/67	3.39213e-05	0.00200209	0	0	7.26928	74.8116	ITGA4;SLPI;CFHR2;PRKCD;IFIT1;B2M;SORL1;IFIT2
regulation of cytokine production (GO:0001817)	10/108	3.45206e-05	0.00200209	0	0	5.48968	56.4008	ZBP1;CCDC88B;IFIH1;IL33;CD83;DDX58;IRF7;EIF2AK2;ISG15;CCR2
positive regulation of tumor necrosis factor secretion (GO:1904469)	4/11	3.54156e-05	0.00200209	0	0	30.3833	311.379	IFIH1;ORM1;DDX58;LGALS9
positive regulation of heterotypic cell-cell adhesion (GO:0034116)	4/11	3.54156e-05	0.00200209	0	0	30.3833	311.379	FGB;FGA;IL1B;FGG
cell-matrix adhesion (GO:0007160)	9/90	4.62935e-05	0.00253773	0	0	5.96642	59.5479	FGB;FGA;VTN;VCAM1;ITGA4;ITGB2;FGG;ITGB7;MSLN
plasminogen activation (GO:0031639)	4/12	5.23426e-05	0.00278493	0	0	26.584	262.057	FGB;FGA;APOH;FGG
receptor-mediated endocytosis (GO:0006898)	13/188	5.47228e-05	0.00282839	0	0	4.0139	39.3894	SYK;ITGB2;APOBR;CLEC9A;SORL1;HSP90B1;HPX;GRK3;CANX;SAA1;HYOU1;CALR;APOB
positive regulation of alpha-beta T cell proliferation (GO:0046641)	4/13	7.44953e-05	0.00374339	0	0	23.629	224.589	SYK;LGALS9;RASAL3;CCR2
extracellular matrix organization (GO:0030198)	14/229	0.000108126	0.00528649	0	0	3.521	32.1545	FGB;FGA;VCAM1;ITGA4;ITGB2;FGG;FN1;PLG;MMP9;THBS1;ADAMTS4;VTN;ITGB7;AGRN
regulation of protein localization to early endosome (GO:1902965)	3/6	0.000123431	0.00557909	0	0	53.0378	477.332	DTX3L;RDX;SORL1
positive regulation of protein localization to early endosome (GO:1902966)	3/6	0.000123431	0.00557909	0	0	53.0378	477.332	DTX3L;RDX;SORL1
positive regulation of protein localization to endosome (GO:1905668)	3/6	0.000123431	0.00557909	0	0	53.0378	477.332	DTX3L;RDX;SORL1
regulation of vascular endothelial growth factor production (GO:0010574)	5/27	0.000126447	0.00557909	0	0	12.1078	108.676	C3;IL1B;PTGS2;SULF1;CCR2
positive regulation of T cell proliferation (GO:0042102)	7/61	0.000136133	0.00567673	0	0	6.93235	61.711	CCDC88B;CD274;VCAM1;PTPRC;SYK;IL1B;CCR2
positive regulation of leukocyte chemotaxis (GO:0002690)	7/61	0.000136133	0.00567673	0	0	6.93235	61.711	CXCL10;CXCL9;CSF1;LGALS9;CALR;THBS1;CCR2
regulation of tumor necrosis factor secretion (GO:1904467)	4/15	0.000138074	0.00567673	0	0	19.3309	171.807	IFIH1;ORM1;DDX58;LGALS9
antigen processing and presentation of peptide antigen via MHC class I (GO:0002474)	5/28	0.000151596	0.00609418	0	0	11.5808	101.845	PDIA3;CANX;TAP1;CALR;B2M
fibrinolysis (GO:0042730)	4/16	0.000181399	0.00698194	0	0	17.7191	152.646	FGB;FGA;FGG;PLG
regulation of interferon-alpha production (GO:0032647)	4/16	0.000181399	0.00698194	0	0	17.7191	152.646	IFIH1;STAT1;DDX58;IRF7
response to type I interferon (GO:0034340)	3/7	0.000213015	0.00756197	0	0	39.7764	336.275	MX1;ISG15;IFIT1
marginal zone B cell differentiation (GO:0002315)	3/7	0.000213015	0.00756197	0	0	39.7764	336.275	DOCK10;NOTCH2;DOCK11
regulation of defense response to virus by host (GO:0050691)	5/30	0.00021319	0.00756197	0	0	10.6533	90.0555	DTX3L;DDX58;STAT1;IFIT1;PARP9
regulation of blood coagulation (GO:0030193)	5/30	0.00021319	0.00756197	0	0	10.6533	90.0555	VTN;SYK;APOH;THBS1;KNG1
positive regulation of tumor necrosis factor production (GO:0032760)	6/47	0.000227557	0.00787915	0	0	7.80993	65.5105	IFIH1;ORM1;DDX58;LGALS9;THBS1;CCR2
positive regulation of interleukin-6 secretion (GO:2000778)	4/17	0.000233738	0.00787915	0	0	16.3552	136.751	IFIH1;DDX58;MBP;LGALS9
regulation of protein binding (GO:0043393)	9/111	0.000235198	0.00787915	0	0	4.73295	39.5442	VTN;SLPI;DTX3L;CFHR2;PRKCD;IFIT1;B2M;SORL1;IFIT2
pattern recognition receptor signaling pathway (GO:0002221)	6/48	0.000256026	0.00842092	0	0	7.62359	63.0489	FGB;FGA;FGG;APOB;S100A9;HSP90B1
positive regulation of T cell activation (GO:0050870)	7/68	0.000270589	0.00874099	0	0	6.13464	50.3955	CCDC88B;CD274;VCAM1;PTPRC;IL1B;LGALS9;CCR2
regulation of cytokine-mediated signaling pathway (GO:0001959)	8/90	0.000278063	0.00882483	0	0	5.22419	42.7739	RNF31;PTPRC;SYK;STAT1;STAT2;PTPN6;USP18;IFNAR1
endodermal cell differentiation (GO:0035987)	5/32	0.000292188	0.00911324	0	0	9.86312	80.2672	VTN;ITGA4;ITGB2;FN1;MMP9
positive regulation of transforming growth factor beta production (GO:0071636)	3/8	0.000336113	0.0102252	0	0	31.8195	254.494	LGALS9;PTGS2;THBS1
positive regulation of cytokine-mediated signaling pathway (GO:0001961)	5/33	0.000339143	0.0102252	0	0	9.51038	75.9793	ZBP1;CSF1;NLRC5;PARP14;PARP9
protein ADP-ribosylation (GO:0006471)	4/19	0.000369593	0.0106126	0	0	14.1731	112.011	PARP10;PARP3;PARP14;PARP9
positive regulation of interferon-alpha production (GO:0032727)	4/19	0.000369593	0.0106126	0	0	14.1731	112.011	IFIH1;DDX58;STAT1;IRF7
positive regulation of blood coagulation (GO:0030194)	4/19	0.000369593	0.0106126	0	0	14.1731	112.011	APOH;PLEK;PLG;THBS1
positive regulation of cell-substrate adhesion (GO:0010811)	6/52	0.00039899	0.0112777	0	0	6.95925	54.4671	FGB;FGA;CSF1;FGG;FN1;CALR
antigen processing and presentation of exogenous peptide antigen via MHC class I, TAP-dependent (GO:0002479)	7/75	0.000495659	0.0130355	0	0	5.50117	41.8618	PDIA3;NCF1;NCF4;TAP1;CALR;B2M;PSMB8
response to molecule of bacterial origin (GO:0002237)	8/98	0.0004963	0.0130355	0	0	4.75787	36.1994	CXCL10;CXCL9;SLPI;NOCT;ACOD1;LGALS9;TNFRSF1B;IFNAR1
mature B cell differentiation involved in immune response (GO:0002313)	3/9	0.000497206	0.0130355	0	0	26.5149	201.685	DOCK10;NOTCH2;DOCK11
negative regulation of fibrinolysis (GO:0051918)	3/9	0.000497206	0.0130355	0	0	26.5149	201.685	APOH;PLG;THBS1
positive regulation of myeloid leukocyte mediated immunity (GO:0002888)	3/9	0.000497206	0.0130355	0	0	26.5149	201.685	FGR;SYK;ITGB2
endoderm formation (GO:0001706)	5/36	0.000514594	0.0132986	0	0	8.58871	65.0348	VTN;ITGA4;ITGB2;FN1;MMP9
positive regulation of defense response to virus by host (GO:0002230)	4/21	0.000554124	0.0141185	0	0	12.5044	93.7594	DTX3L;STAT1;DDX58;PARP9
antigen processing and presentation of exogenous peptide antigen via MHC class I (GO:0042590)	7/78	0.000629062	0.0158052	0	0	5.26791	38.8313	PDIA3;NCF1;NCF4;TAP1;CALR;B2M;PSMB8
positive regulation of innate immune response (GO:0045089)	5/38	0.000664574	0.0160953	0	0	8.06736	59.0237	ZBP1;GBP5;DHX58;NLRC5;DDX60
regulation of interferon-gamma-mediated signaling pathway (GO:0060334)	4/22	0.000667367	0.0160953	0	0	11.8091	86.3501	STAT1;NLRC5;PARP14;PARP9
STAT cascade (GO:0097696)	4/22	0.000667367	0.0160953	0	0	11.8091	86.3501	STAT1;STAT2;CCR2;IFNAR1
response to lipopolysaccharide (GO:0032496)	10/155	0.000676197	0.0160953	0	0	3.70134	27.0162	CD274;CXCL10;CXCL9;SLPI;PABPN1;NOCT;ACOD1;LGALS9;TNFRSF1B;IFNAR1
positive regulation of lipid localization (GO:1905954)	3/10	0.000700493	0.016457	0	0	22.7259	165.074	C3;APOB;IKBKE
positive regulation of phagocytosis (GO:0050766)	5/39	0.00075078	0.0174123	0	0	7.82968	56.3299	C3;IL1B;CALR;DOCK2;C2
cellular protein metabolic process (GO:0044267)	20/484	0.000820047	0.018778	0	0	2.33992	16.6278	FGA;WARS;CSF1;IGFBP5;UBA7;SERPINC1;FGG;FN1;UBE2L6;CSF2RB;PLG;MSLN;PDIA6;SORL1;KNG1;HSP90B1;C3;SAA1;APOB;B2M
response to endoplasmic reticulum stress (GO:0034976)	8/106	0.000836398	0.018913	0	0	4.36768	30.9512	PDIA3;SYVN1;ATP2A2;HYOU1;PDIA6;THBS1;PDIA4;HSP90B1
positive regulation of immune effector process (GO:0002699)	4/24	0.000941343	0.0199951	0	0	10.6271	74.0518	DHX58;LGALS9;DDX60;CCR2
receptor clustering (GO:0043113)	4/24	0.000941343	0.0199951	0	0	10.6271	74.0518	ITGA4;ITGB2;ITGB7;AGRN
positive regulation of vascular endothelial growth factor production (GO:0010575)	4/24	0.000941343	0.0199951	0	0	10.6271	74.0518	C3;IL1B;SULF1;PTGS2
regulation of phagocytosis (GO:0050764)	5/41	0.000947897	0.0199951	0	0	7.39395	51.4712	FGR;SYK;IL1B;CALR;DOCK2
positive regulation of leukocyte degranulation (GO:0043302)	3/11	0.000949899	0.0199951	0	0	19.8841	138.377	FGR;SYK;ITGB2
positive regulation of cell migration (GO:0030335)	12/221	0.000950569	0.0199951	0	0	3.08839	21.4904	FGR;VTN;PTPRC;CSF1;SEMA3C;IL1B;RDX;FN1;INSL3;MMP9;THBS1;CCR2
toll-like receptor signaling pathway (GO:0002224)	7/86	0.00112704	0.0234347	0	0	4.73252	32.1251	FGB;FGA;ITGB2;FGG;APOB;S100A9;HSP90B1
positive regulation of interleukin-6 production (GO:0032755)	5/43	0.00118109	0.0240066	0	0	7.00408	47.2167	IFIH1;DDX58;IL1B;MBP;LGALS9
regulation of interferon-gamma production (GO:0032649)	5/43	0.00118109	0.0240066	0	0	7.00408	47.2167	CD274;IL1B;ISG15;LGALS9;CCR2
negative regulation of fibroblast growth factor receptor signaling pathway (GO:0040037)	3/12	0.00124909	0.0251066	0	0	17.6739	118.156	GPC1;SULF1;THBS1
positive regulation of wound healing (GO:0090303)	4/26	0.00128606	0.0255658	0	0	9.66001	64.2987	VTN;APOH;INSL3;THBS1
leukocyte cell-cell adhesion (GO:0007159)	4/27	0.00148774	0.0289389	0	0	9.23954	60.154	VCAM1;SYK;ITGA4;ITGB2
positive regulation of substrate adhesion-dependent cell spreading (GO:1900026)	4/27	0.00148774	0.0289389	0	0	9.23954	60.154	FGB;FGA;FGG;CALR
negative regulation of hemostasis (GO:1900047)	3/13	0.00160147	0.0298665	0	0	15.9057	102.382	VTN;APOH;KNG1
cellular response to exogenous dsRNA (GO:0071360)	3/13	0.00160147	0.0298665	0	0	15.9057	102.382	IFIH1;DDX58;IFIT1
regulation of superoxide anion generation (GO:0032928)	3/13	0.00160147	0.0298665	0	0	15.9057	102.382	SYK;ITGB2;PRKCD
regulation of fibrinolysis (GO:0051917)	3/13	0.00160147	0.0298665	0	0	15.9057	102.382	APOH;PLG;THBS1
response to interferon-gamma (GO:0034341)	6/68	0.00167166	0.0305458	0	0	5.15909	32.9869	IFITM3;GBP6;CIITA;STAT1;ACOD1;LGALS9
regulation of endopeptidase activity (GO:0052548)	6/68	0.00167166	0.0305458	0	0	5.15909	32.9869	VTN;SERPINC1;TIMP3;SERPING1;KNG1;PSMB8
positive regulation of intracellular signal transduction (GO:1902533)	19/479	0.00175743	0.0317919	0	0	2.23639	14.1874	RNF31;CXCL9;NCF1;UNC5B;CARD9;EIF2AK2;DDX60;TNFRSF1B;THBS1;EDA2R;FGR;CXCL10;GPRC5B;TRIM5;DHX58;PTPN6;LGALS9;IKBKE;S100A9
negative regulation of endothelial cell proliferation (GO:0001937)	4/30	0.00222324	0.0398202	0	0	8.17219	49.9222	STAT1;APOH;SULF1;THBS1
negative regulation of macromolecule metabolic process (GO:0010605)	8/124	0.00228848	0.0405868	0	0	3.68654	22.4137	NOTCH2;PARP10;NOCT;LGALS9;PARP14;UPK3B;PARP9;TARDBP
NAD biosynthesis via nicotinamide riboside salvage pathway (GO:0034356)	3/15	0.00247824	0.0422937	0	0	13.2534	79.523	PARP10;PARP9;PTGS2
regulation of mast cell degranulation (GO:0043304)	3/15	0.00247824	0.0422937	0	0	13.2534	79.523	FGR;SYK;LGALS9
positive regulation of vasoconstriction (GO:0045907)	3/15	0.00247824	0.0422937	0	0	13.2534	79.523	FGB;FGA;FGG
negative regulation of coagulation (GO:0050819)	3/15	0.00247824	0.0422937	0	0	13.2534	79.523	VTN;APOH;KNG1
regulation of immune response (GO:0050776)	12/251	0.00277091	0.0466992	0	0	2.69655	15.8789	C3;FGR;VCAM1;SYK;SELL;ITGA4;DHX58;ITGB2;IRF7;ITGB7;SAMHD1;B2M
positive regulation of NF-kappaB transcription factor activity (GO:0051092)	8/128	0.00278801	0.0466992	0	0	3.56292	20.9586	RNF31;TRIM5;IL1B;EIF2AK2;LGALS9;S100A9;EDA2R;NFKB2
negative regulation of extrinsic apoptotic signaling pathway (GO:2001237)	6/76	0.00294914	0.0489449	0	0	4.56761	26.612	FGB;FGA;UNC5B;IL1B;FGG;THBS1
cellular response to dsRNA (GO:0071359)	3/16	0.00300828	0.0490269	0	0	12.2333	71.0311	IFIH1;DDX58;IFIT1
T cell migration (GO:0072678)	3/16	0.00300828	0.0490269	0	0	12.2333	71.0311	CXCL10;CXCL9;MYO1G
