# Supplementary material for: Continuous sensing of IFNα by hepatic endothelial cells shapes a vascular antimetastatic barrier
Source: eLife journal article supplement (doi:10.7554/elife.80690), 2022-09-19
Supplement: fig6-figsupp1-data1 [file Figure 6 - figure supplement 1 - source data 1.xlsx]

## Sheet: File info
	Figure 6 - figure supplement 1 - source data 1
	Data for the graphs in the figure.

## Sheet: 1B
	Figure 6 - figure supplement 1 - source data 1
	Figure 6 - figure supplement 1 - source data 1B. Percentage of fenestated cells within CD31+ sorted cells 12 hours after in vitro adhesion onto fibronectin-coated coverslips.
	% of fenestated cells within CD31+ cells	LSEC+	LSEC-
		96	4
