# Supplementary material for: Continuous sensing of IFNα by hepatic endothelial cells shapes a vascular antimetastatic barrier
Source: eLife journal article supplement (doi:10.7554/elife.80690), 2022-09-19
Supplement: fig7-data1 [file Figure 7 - Source data 1.xlsx]

## Sheet: File info
	Figure 7 - Source data 1
	Data for the graphs in the figure.

## Sheet: Figure 7A
	Figure 7 - Source data 1
	Figure 7A. Percentage of OT-I CD8+ T cells expressing CD44+IFNγ+ generated after the co-cultured with HECs, including LSECs, or sDCs isolated from Ifnar1fl/fl and VeCadIfnar1-KO mice and stimulated with SIINFEKL peptide
		NaCl + SIINFEKL						IFNa1 + SIINFEKL
	Ifnar1fl/fl-HEC+OT1	1.8	2.01	2.03	2.45	2.41	2.06	6.2	5.36	5.21	4.46	4.72	3.47
	Ifnar1fl/fl-sDC+OT1	9.7	14.4	15.1	14.8	12.2	10.6	26.6	24.5	27.9	27.9	26.6	27.3
	VeCad_Ifnar1_KO-HEC+OT1	3.87	3.65	3.95	3	6.44	6.33	0	0	0	0	0	0
	VeCad_Ifnar1_KO-sDC+OT1	13.2	15.8	12.3	17.5	10.6	19.6	26.8	28.5	25.6	24.4	25.8	29.8
	two-way ANOVA test	Summary	p value
	NaCl + SIINFEKL
	HEC+OT1 vs. DC+OT1	***	0.0005
	HEC+OT1 vs. HEC-KO+OT1	ns	0.0558
	HEC+OT1 vs. DC-KO+OT1	*	0.0315
	DC+OT1 vs. HEC-KO+OT1	*	0.0103
	DC+OT1 vs. DC-KO+OT1	ns	0.7714
	HEC-KO+OT1 vs. DC-KO+OT1	ns	0.0869
	IFNa1 + SIINFEKL
	HEC+OT1 vs. DC+OT1	****	<0,0001
	HEC+OT1 vs. HEC_KO+OT1	***	0.0003
	HEC+OT1 vs. DC_KO+OT1	**	0.0039
	DC+OT1 vs. HEC_KO+OT1	****	<0,0001
	DC+OT1 vs. DC_KO+OT1	ns	>0,9999
	HEC-KO+OT1 vs. DC_KO+OT1	**	0.003
	NaCl + SIINFEKL - IFNa1 + SIINFEKL
	HEC+OT1	*	0.0409
	DC+OT1	****	<0,0001
	HEC_KO+OT1	***	0.0003
	DC_KO+OT1	****	<0,0001

## Sheet: Figure 7B
	Figure 7 - Source data 1
	Figure 7A. Percentage of OT-I CD8+ T cells expressing CD44+IFNγ+ generated after the co-cultured with HECs, including LSECs, or sDCs isolated from Ifnar1fl/fl and VeCadIfnar1-KO mice and stimulated with sOVA peptide
		NaCl + sOVA						IFNa1 + sOVA
	Ifnar1fl/fl-HEC+OT1	6.89	7.55	6.3	7.24	7.45	7.36	34.4	35.2	37.5	47.8	48.8	43.2
	Ifnar1fl/fl-sDC+OT1	22.8	17	23.7	13.7	13.2	12.9	39	40.1	41.2	29.7	32.6	30.3
	VeCad_Ifnar1_KO-HEC+OT1	5.48	5.85	5.8	13.6	13.2	13.4	10.6	8.3	6.89	14.1	14.2	14.7
	VeCad_Ifnar1_KO-sDC+OT1	13.6	13.38	13.63	17.5	15.3	13.4	30.9	35.3	35.4	34.3	33.6	31.8
	two-way ANOVA test	Summary	p value
	NaCl + sOVA
	HEC+OT1 vs. sDC+OT1	***	0.0005
	HEC+OT1 vs. HEC_KO+OT1	ns	0.7188
	HEC+OT1 vs. sDC_KO+OT1	*	0.014
	sDC+OT1 vs. HEC_KO+OT1	**	0.0096
	sDC+OT1 vs. sDC_KO+OT1	ns	0.6331
	HEC_KO+OT1 vs. sDC_KO+OT1	ns	0.1588
	IFNa1 + sOVA
	HEC+OT1 vs. sDC+OT1	ns	0.0811
	HEC+OT1 vs. HEC_KO+OT1	****	<0,0001
	HEC+OT1 vs. sDC_KO+OT1	*	0.0104
	sDC+OT1 vs. HEC_KO+OT1	****	<0,0001
	sDC+OT1 vs. sDC_KO+OT1	ns	0.8345
	HEC_KO+OT1 vs. sDC_KO+OT1	****	<0,0001
	NaCl + sOVA - IFNa1 + sOVA
	HEC+OT1	****	<0,0001
	sDC+OT1	****	<0,0001
	HEC_KO+OT1	ns	0.8796
	sDC_KO+OT1	****	<0,0001

## Sheet: Figure 7C
	Figure 7 - Source data 1
	Figure 7C. Percentage of splenic T central memory and naïve T cells 21 days after MC38 cells injection into NaCl- or IFNα-treated Ifnar1fl/fl and VeCad_Ifnar1_KO mice.
	Central memory T cells	Sham	Ifnar1_fl/fl + NaCl	Ifnar1_fl/fl + IFNa	VeCad_Ifnar1_KO + NaCl	VeCad_Ifnar1_KO + IFNa
		10.8	12.2	23.8	14.6521	15
		10.2	12.1	20.2	10.6939	13.5
		9.33	12.9	19.2	14.2031	14.8
		7.54	11.7	21.2	12.4069	9.96213
		5.83		20.8
		15.3		30.1
		9.96		18.1
		p-values by Mann-Whitney test	Summary	p value
		Ifnar1_fl/fl + NaCl vs Ifnar1_fl/fl + IFNa	**	0.0061
	Naïve T cells	Sham	Ifnar1_fl/fl + NaCl	Ifnar1_fl/fl + IFNa	VeCad_Ifnar1_KO + NaCl	VeCad_Ifnar1_KO + IFNa
		84.5	82.3	73.2	85.3	79.4687
		79.7	82.1	74.4	87.5	86.2647
		85.8	82.7	76.7	84.5	87.032
		85.2	81.8	71.6	79.4	88.1
		85.3		73
				61.6
				73.1
		p-values by Mann-Whitney test	Summary	p value
		Ifnar1_fl/fl + NaCl vs Ifnar1_fl/fl + IFNa	**	0.0061

## Sheet: Figure 7E
	Figure 7 - Source data 1
	Figure 7E. Kinetics of subcutaneous tumor growth in naïve and IFNα-cured mice
	Days	Naïve mice										IFNα-cured mice
	7	0	0	0	0	0	0	0	0	0	0	0	0	0	0	0	0	0
	14	16	9	4	11.25	15.75	37.5	0	18	13.5	9	0	0	0	0	0	0	0
	21	160	108	108	90	147	62.5	75	147	126	90	0	0	0	9	0	0	0
	28	249	171.5	324	90	500	147	324	500	500	108	0	0	0	9	0	0	0
	35	500	350	500	250		224	500			324	0	0	0	9	0	0	0
	two-way ANOVA test
	Naïve vs IFNα-cured mice
	Day	Summary	p value
	14	*	0.0118
	21	****	<0,0001
	28	**	0.0017
	35	***	0.0009
