# Supplementary material for: Continuous sensing of IFNα by hepatic endothelial cells shapes a vascular antimetastatic barrier
Source: eLife journal article supplement (doi:10.7554/elife.80690), 2022-09-19
Supplement: fig7-figsupp1-data1 [file Figure 7 - figure supplement 1 - source data 1.xlsx]

## Sheet: File info
	Figure 7 - figure supplement 1 - source data 1
	Data for the graphs in the figure.

## Sheet: 1A
	Figure 7 - figure supplement 1 - source data 1
	Figure 7 - figure supplement 1 - source data 1A. MFI of MHC-I and the percentage of CD86 and IL-6RA cells within the hepatic CD31+ population of Ifnar1fl/fl and VeCadIfnar1_KO mice after 7 days of NaCl or IFNα therapy.
	MHC-I MFI	Ifnar1fl/fl + NaCl	Ifnar1fl/fl + IFNa	VeCadIfnar1_KO + NaCl	VeCadIfnar1_KO + IFNa
		3443	7834	2274	2938
		3059	8109	2173	2644
		2674	7681	2170	3627
	Tukey's multiple comparisons test	Summary	p value
	Ifnar1fl/fl-NaCl vs. Ifnar1fl/fl-IFNa1	****	<0,0001
	Ifnar1fl/fl-NaCl vs. VeCadIfnar1_KO-NaCl	ns	0.0574
	Ifnar1fl/fl-NaCl vs. VeCadIfnar1_KO-IFNa1	ns	>0,9999
	Ifnar1fl/fl-IFNa1 vs. VeCadIfnar1_KO-NaCl	****	<0,0001
	Ifnar1fl/fl-IFNa1 vs. VeCadIfnar1_KO-IFNa1	****	<0,0001
	VeCadIfnar1_KO-NaCl vs. VeCadIfnar1_KO-IFNa1	ns	0.0542
	% CD86 within CD31	Ifnar1fl/fl + NaCl	Ifnar1fl/fl + IFNa	VeCadIfnar1_KO + NaCl	VeCadIfnar1_KO + IFNa
		6.96	25.4	5.25	18.5
		6.57	27.8	5.72	9.2
		9.46	32.5	5.7	3.98
	Tukey's multiple comparisons test	Summary	p value
	Ifnar1fl/fl-NaCl vs. Ifnar1fl/fl-IFNa1	**	0.0013
	Ifnar1fl/fl-NaCl vs. VeCadIfnar1_KO-NaCl	ns	0.9234
	Ifnar1fl/fl-NaCl vs. VeCadIfnar1_KO-IFNa1	ns	0.8296
	Ifnar1fl/fl-IFNa1 vs. VeCadIfnar1_KO-NaCl	***	0.0007
	Ifnar1fl/fl-IFNa1 vs. VeCadIfnar1_KO-IFNa1	**	0.0033
	VeCadIfnar1_KO-NaCl vs. VeCadIfnar1_KO-IFNa1	ns	0.4965
	% IL-6RA within CD31	Ifnar1fl/fl + NaCl	Ifnar1fl/fl + IFNa	VeCadIfnar1_KO + NaCl	VeCadIfnar1_KO + IFNa
		5.02	12.5	5.45	9.35
		4.82	12.8	3.71	4.78
		4.24	13.5	5.74	4.03
	Tukey's multiple comparisons test	Summary	p value
	Ifnar1fl/fl-NaCl vs. Ifnar1fl/fl-IFNa1	***	0.0009
	Ifnar1fl/fl-NaCl vs. VeCadIfnar1_KO-NaCl	ns	0.9963
	Ifnar1fl/fl-NaCl vs. VeCadIfnar1_KO-IFNa1	ns	0.7228
	Ifnar1fl/fl-IFNa1 vs. VeCadIfnar1_KO-NaCl	**	0.0012
	Ifnar1fl/fl-IFNa1 vs. VeCadIfnar1_KO-IFNa1	**	0.003
	VeCadIfnar1_KO-NaCl vs. VeCadIfnar1_KO-IFNa1	ns	0.832
