# Supplementary figures and images for: Continuous sensing of IFNα by hepatic endothelial cells shapes a vascular antimetastatic barrier
Source: eLife journal article supplement (doi:10.7554/elife.80690), 2022-09-19

Figure 4 - figure supplement 1-source data 1

Uncropped gel with labeling of panel (A)

A

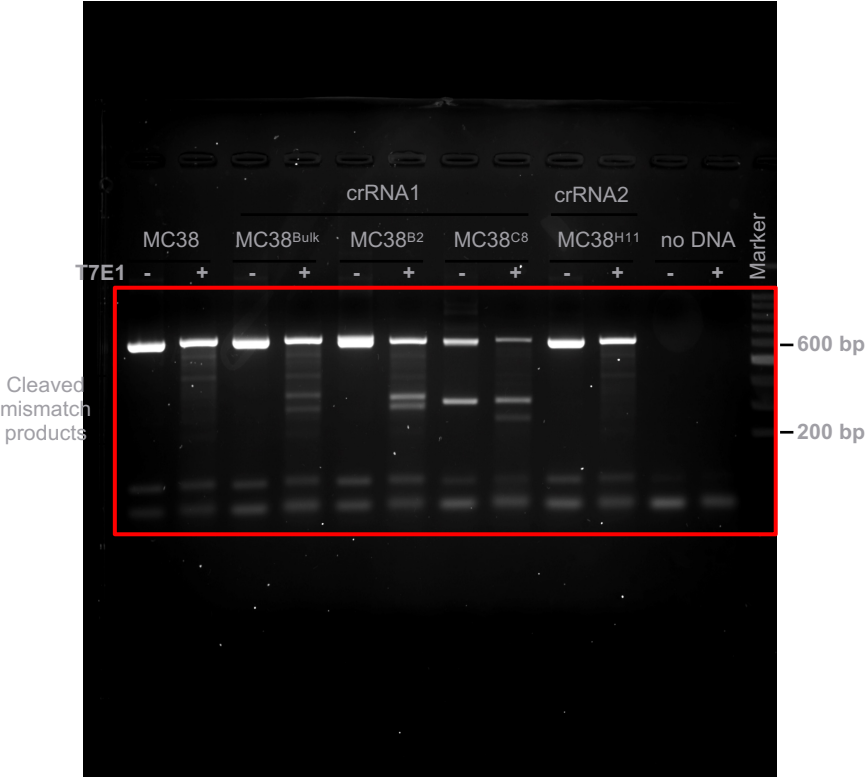

Supplement: fig4-figsupp1-data1 [file elife-80690-fig4-figsupp1-data1-v1.zip]

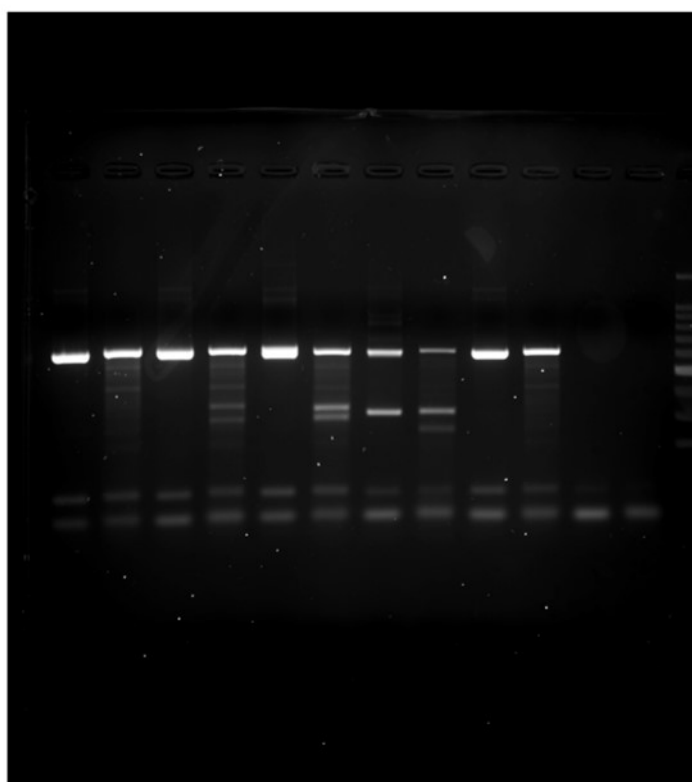

Supplement: fig4-figsupp1-data1 [file elife-80690-fig4-figsupp1-data1-v1.zip]

Uncropped gel with labeling of panel (D)

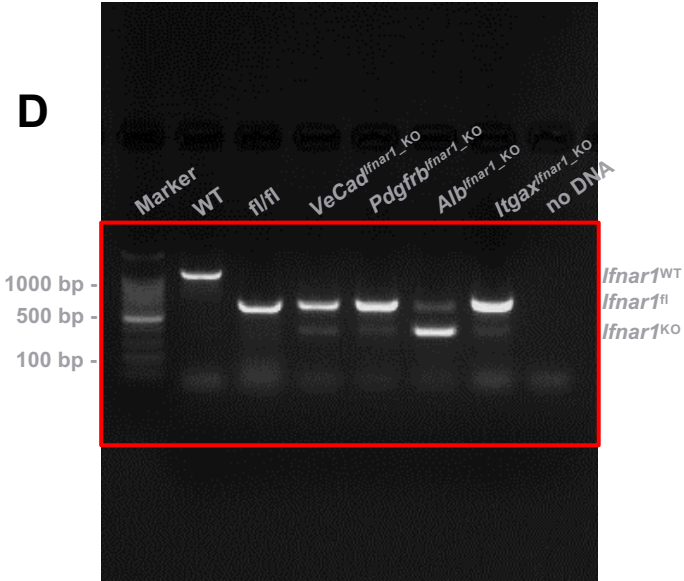

Supplement: fig4-figsupp1-data3 [file Figure 4 - figure supplement 1_Source data 3 uncropped.pdf › Figure 4 - figure supplement 1 - source data 3/Figure 4 - figure supplement 1_Source data 3 uncropped.pdf]

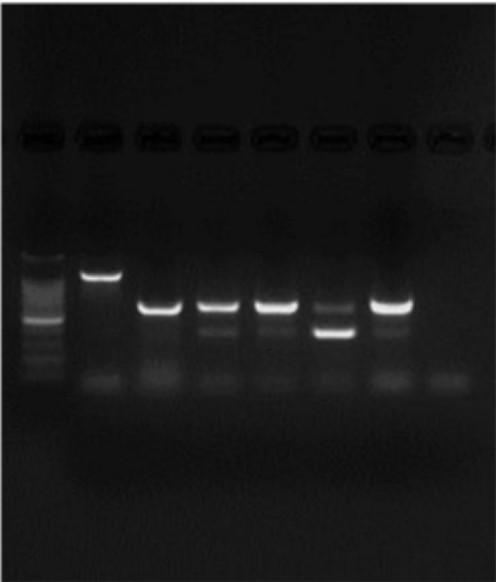

Supplement: fig4-figsupp1-data3 [file Figure 4 - figure supplement 1_Source data 3.pdf › Figure 4 - figure supplement 1 - source data 3/Figure 4 - figure supplement 1_Source data 3.pdf]

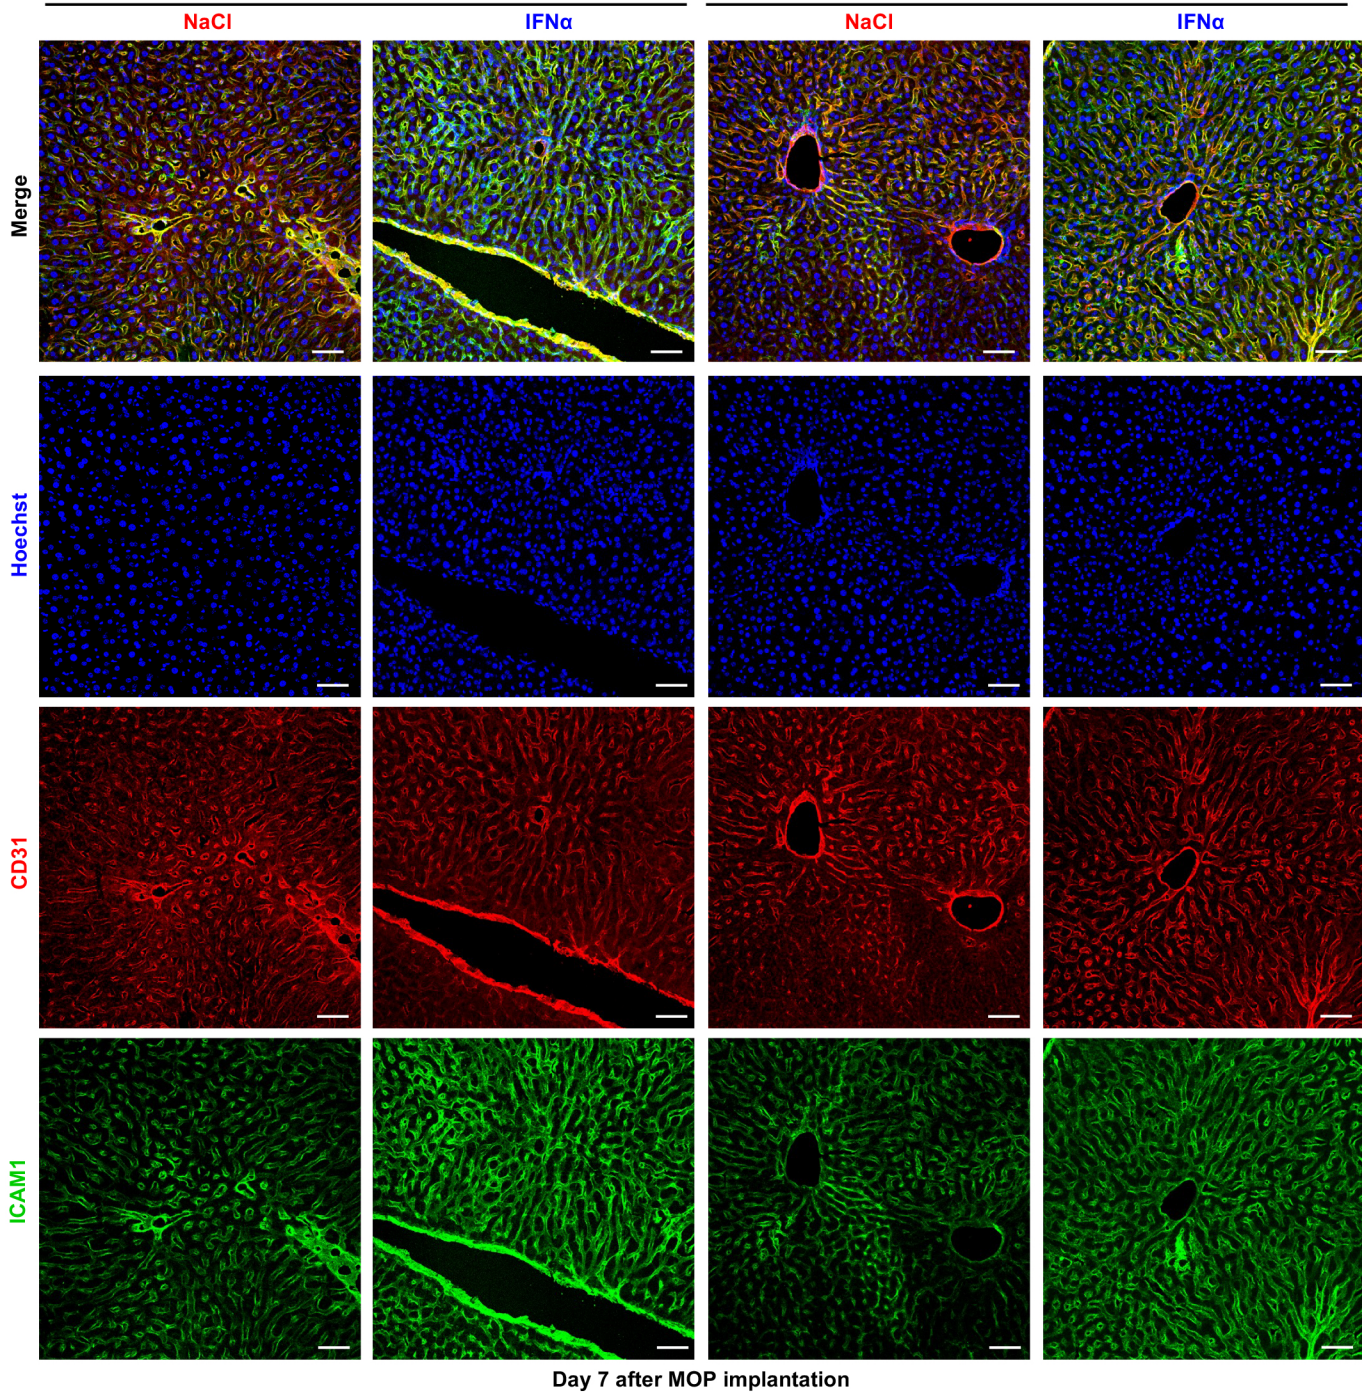

Supplement: fig5-figsupp1-data4 [file elife-80690-fig5-figsupp1-data4-v1.zip]
